# Supplementary material
Source: publisher figshare collection journal article supplement (https://gsajournals.figshare.com/articles/dataset/_/7005842)
Supplement: Supplementary file 1 [file 2]

## Sheet: MB vs WH DE genes
All MB samples compared to all WH samples. Mean gene count >50. FDR <0.05
Gene Name	Flybase ID	baseMean	Log2 Fold Change	Fold Difference	FDR Q Value
Unc84	N/A	145058	4.08251	16.9417	3.16063e-132
CG13055	FBgn0036583	2785.54	3.62554	12.3423	2.65855e-51
Hsp70Bb	FBgn0013278	3642.1	3.38134	10.4204	2.04218e-50
prt	FBgn0043005	2161.83	3.32452	10.018	5.6416e-38
Ldh	FBgn0001258	2083.34	2.97707	7.87386	7.28121e-30
Hr51	FBgn0034012	877.456	2.94798	7.71666	6.24817e-18
Lgr3	FBgn0039354	668.871	2.66271	6.33223	1.22002e-12
ey	FBgn0005558	10890.1	2.55749	5.88681	7.47298e-64
Rgk1	FBgn0264753	16778	2.49154	5.62379	2.56122e-42
CG32204	FBgn0052204	13206.5	2.44194	5.43373	5.64042e-59
CG34402	FBgn0085431	1332.01	2.41695	5.34042	1.79087e-15
TTLL3A	FBgn0031854	468.2	2.40267	5.28782	1.26223e-08
Dop1R2	FBgn0266137	13645.6	2.34526	5.08154	1.21007e-70
Nep1	FBgn0029843	4168.85	2.27868	4.85234	3.73094e-30
GstD11	FBgn0038029	313.963	2.23462	4.70639	2.54053e-06
dac	FBgn0005677	10481.7	2.21699	4.64922	1.21626e-61
CG30158	FBgn0050158	13113.6	2.19373	4.57487	5.74875e-42
Sytalpha	FBgn0261089	7458.8	2.0327	4.09171	1.93479e-56
CG5830	FBgn0036556	52732.1	1.99966	3.99905	3.04604e-41
CG42753	FBgn0261807	247.666	1.99743	3.99288	7.03172e-05
MFS3	FBgn0031307	598.167	1.99344	3.98185	6.33946e-07
Cyp4aa1	FBgn0034053	872.098	1.99275	3.97995	1.78877e-08
jdp	FBgn0027654	19448.5	1.93314	3.81885	6.051e-36
rut	FBgn0003301	47681.5	1.9275	3.80395	6.20015e-62
CG5065	FBgn0034145	21844.4	1.9273	3.80343	5.50649e-33
bond	FBgn0260942	961.579	1.89942	3.73064	3.47881e-08
phyl	FBgn0013725	2520.77	1.89103	3.70899	7.8802e-35
prage	FBgn0261548	9590.65	1.88896	3.70368	1.28884e-27
hec	FBgn0030437	791.226	1.87595	3.67042	3.44173e-07
Smyd4-1	FBgn0033427	730.39	1.80446	3.49299	2.0134e-06
Dop1R1	FBgn0011582	22496.5	1.78696	3.45086	1.56554e-69
CG31191	FBgn0051191	5819.51	1.76734	3.40425	1.94828e-21
Elk	FBgn0011589	10027.3	1.72624	3.30865	7.28121e-30
sNPF	FBgn0032840	14904	1.71994	3.29423	3.73044e-52
dysf	FBgn0039411	508.86	1.70135	3.25205	6.70068e-09
CG34219	FBgn0085248	258.934	1.69403	3.23559	0.0011942
Ir68a	FBgn0036150	196.153	1.68251	3.20987	0.00238602
CG11835	FBgn0031264	571.968	1.63958	3.11574	8.67734e-05
CG13921	FBgn0035267	1461.57	1.63242	3.10032	9.53407e-08
a	FBgn0000008	7079.41	1.60321	3.03819	1.38828e-14
CG11191	FBgn0033249	1135.04	1.55667	2.94175	3.16603e-06
Pka-R2	FBgn0022382	34617.2	1.47732	2.7843	6.44458e-88
Pka-C1	FBgn0000273	43496	1.45548	2.74248	2.59036e-58
PVRAP	FBgn0052406	6862.45	1.45132	2.73458	1.79087e-15
GC	FBgn0035245	1311.17	1.44146	2.71596	1.32898e-11
CG13618	FBgn0039203	479.699	1.44136	2.71577	0.00149457
CCT3	FBgn0015019	1092.96	1.41358	2.66397	3.48137e-09
CG44774	FBgn0266000	9988.87	1.41182	2.66072	3.72752e-25
Mlp60A	FBgn0259209	709.939	1.40646	2.65086	0.000431296
Dgp-1	FBgn0027836	1971.43	1.39852	2.63631	6.25192e-14
betaTub56D	FBgn0003887	4754.04	1.3938	2.62769	4.46971e-12
Tmc	FBgn0036017	530.561	1.37314	2.59033	0.00196085
CG32700	FBgn0267253	7906.41	1.35704	2.5616	1.1267e-40
Updo	FBgn0033428	489.934	1.35603	2.55979	0.00296247
Hr38	FBgn0014859	8679.93	1.35482	2.55765	3.79935e-11
Ac78C	FBgn0024150	1970.71	1.34268	2.53622	2.93823e-10
lncRNA:CR45388	FBgn0266937	350.62	1.32715	2.50907	0.00908299
mub	FBgn0262737	154972	1.31289	2.48438	1.09735e-22
wat	FBgn0039620	9277.06	1.31194	2.48276	1.51006e-13
CG4611	FBgn0035591	264.494	1.31041	2.48011	0.0162805
Oamb	FBgn0024944	8023.19	1.2986	2.45991	1.08688e-23
CG43366	FBgn0263109	280.001	1.29798	2.45885	0.0115741
toy	FBgn0019650	22493.1	1.2962	2.45582	5.89085e-28
SP1173	FBgn0035710	2191.54	1.29616	2.45575	3.12454e-06
cactin	FBgn0031114	1007.76	1.28817	2.44217	0.000204505
Ku80	FBgn0041627	243.516	1.26457	2.40256	0.0259228
CG9492	FBgn0037726	461.037	1.26089	2.39643	0.00767225
POSH	FBgn0040294	693.935	1.25575	2.38791	0.002306
Syt14	FBgn0261086	2008.04	1.25507	2.38679	1.19645e-05
CG3625	FBgn0031245	2833.83	1.24955	2.37767	3.03858e-20
CG11221	FBgn0031855	2621.55	1.23221	2.34927	7.1427e-13
Ag5r	FBgn0015010	476.636	1.23063	2.34669	0.00891774
Oli	FBgn0032651	402.312	1.22932	2.34457	0.00320592
CG6972	FBgn0039008	212.805	1.21638	2.32362	0.0387875
CG31523	FBgn0051523	7451.61	1.20292	2.30205	1.46898e-08
gprs	FBgn0024232	6897.33	1.20083	2.29871	2.32415e-08
cos	FBgn0000352	1794.18	1.19928	2.29626	1.2949e-19
coro	FBgn0265935	2940.84	1.19921	2.29614	5.65804e-12
CG15602	FBgn0030694	356.636	1.1974	2.29326	0.0211227
CG15894	FBgn0029864	7166.26	1.19657	2.29194	2.65855e-51
CG5961	FBgn0038056	269.663	1.18487	2.27342	0.0162223
viaf	FBgn0036237	677.647	1.18474	2.27323	0.00483834
CG8248	FBgn0033347	664.199	1.18197	2.26887	0.00530527
lcs	FBgn0028583	1791.87	1.17718	2.26134	9.04614e-05
CngB	FBgn0266346	990.805	1.16545	2.24304	0.00157772
CG1896	FBgn0039870	321.229	1.16359	2.24014	0.0309845
CG14883	FBgn0038432	321.11	1.1627	2.23875	0.0311029
CG42339	FBgn0259241	11157.5	1.16022	2.23491	7.18076e-16
rad	FBgn0265597	35858.4	1.15864	2.23247	2.24647e-17
TpnC73F	FBgn0010424	301.701	1.15489	2.22667	0.0323644
smo	FBgn0003444	354.06	1.15267	2.22325	0.0143019
Mp20	FBgn0002789	2932.24	1.15092	2.22055	9.86614e-06
CG7708	FBgn0038641	8338.92	1.14316	2.20865	2.7802e-08
CG12264	FBgn0032393	342.784	1.13762	2.20018	0.0324784
CG31760	FBgn0051760	7086.8	1.12858	2.18643	1.4171e-23
5-HT1B	FBgn0263116	2540.76	1.12579	2.18221	1.80563e-14
CG2938	FBgn0029685	1171.1	1.12471	2.18058	1.55451e-10
GlyT	FBgn0034911	5751.69	1.11746	2.16965	1.18793e-14
TBCB	FBgn0034451	332.897	1.10852	2.15625	0.0399027
metro	FBgn0050021	3328.18	1.10683	2.15371	1.15949e-17
Sap130	FBgn0262714	3566.72	1.10657	2.15333	1.79418e-29
CCT1	FBgn0003676	405.797	1.10092	2.14492	0.0309489
Prm	FBgn0003149	5090.92	1.09753	2.13989	1.84291e-06
BEAF-32	FBgn0015602	474.125	1.09332	2.13365	0.00144577
CG9368	FBgn0036890	1274.59	1.07546	2.10739	0.00171915
Dop2R	FBgn0053517	21171.8	1.07466	2.10623	9.55856e-20
Shawl	FBgn0085395	6321.38	1.07425	2.10563	4.56116e-15
Ykt6	FBgn0260858	600.211	1.07401	2.10528	0.00269095
Pzl	FBgn0267430	13382.5	1.0722	2.10264	7.46204e-08
CG11200	FBgn0034500	648.628	1.07062	2.10034	0.0143464
CG5641	FBgn0038046	363.489	1.06806	2.09661	0.0129621
CG11898	FBgn0039645	225.359	1.06302	2.08931	0.0490237
Baldspot	FBgn0260960	8397.59	1.06073	2.08598	1.45549e-12
Hip14	FBgn0259824	1767.66	1.06005	2.085	3.88831e-10
CG3630	FBgn0023540	1611.29	1.0576	2.08147	0.000890116
Hsc70-3	FBgn0001218	14292.2	1.05414	2.07648	8.62825e-17
CG10585	FBgn0037044	252.083	1.05285	2.07463	0.0187121
CG12299	FBgn0032295	1192.04	1.04975	2.07017	0.00294993
CG13532	FBgn0034788	710.32	1.04829	2.06808	0.010629
kin17	FBgn0024887	212.785	1.04503	2.06341	0.0454891
ADPS	FBgn0033983	849.981	1.03086	2.04324	0.0100817
Snap24	FBgn0266720	1131.78	1.03086	2.04324	0.00425772
btsz	FBgn0266756	21014	1.02971	2.04162	1.04454e-17
CG10362	FBgn0030358	1362.23	1.02955	2.04139	6.4474e-13
CanB	FBgn0010014	1224.89	1.02869	2.04018	0.000389086
CG31522	FBgn0051522	13725.4	1.02691	2.03766	1.03776e-17
Cpr67B	FBgn0035985	836.705	1.01967	2.02746	0.0115741
SIFaR	FBgn0038880	1365.77	1.01741	2.02428	1.2297e-06
CG43861	FBgn0264443	4637.55	1.01355	2.01887	2.52259e-06
RNaseZ	FBgn0028426	413.841	1.0072	2.01001	0.0319954
CG4461	FBgn0035982	567.611	1.00691	2.0096	0.0280347
SerRS	FBgn0031497	470.393	1.001	2.00139	0.0442289
Gycalpha99B	FBgn0013972	2633.74	0.996625	1.99533	0.000295905
mspo	FBgn0020269	12303	0.994642	1.99259	1.01336e-20
CCKLR-17D1	FBgn0259231	1300.32	0.992828	1.99008	0.00413261
AsnRS	FBgn0086443	694.35	0.992449	1.98956	3.34445e-05
Zw10	FBgn0004643	354.357	0.988508	1.98413	0.0356656
Pxn	FBgn0011828	7724.44	0.986688	1.98163	7.93859e-10
CG6044	FBgn0034725	2807.59	0.984198	1.97821	3.45768e-14
jus	FBgn0039647	20823.2	0.976852	1.96817	1.31491e-23
CG4645	FBgn0030435	285.061	0.974833	1.96541	0.029563
CG33116	FBgn0053116	638.162	0.974376	1.96479	0.0308243
eEF1alpha2	FBgn0000557	18454.5	0.972237	1.96188	9.77269e-12
CG3078	FBgn0023524	1989.43	0.972142	1.96175	6.96606e-36
Ppcs	FBgn0261285	3609.88	0.969489	1.95815	9.17309e-20
Unc-89	FBgn0053519	6554.37	0.969469	1.95812	1.36408e-05
CG8500	FBgn0037754	8182.09	0.967016	1.95479	3.89709e-13
Rgk3	FBgn0085426	5129.27	0.966375	1.95392	7.62225e-06
fz	FBgn0001085	11748.3	0.964589	1.95151	3.36899e-08
qm	FBgn0019662	3958.04	0.962557	1.94876	1.74109e-08
amon	FBgn0023179	16670.7	0.959594	1.94476	3.70708e-11
fend	FBgn0030090	3608.77	0.956594	1.94072	2.11631e-17
Ric	FBgn0265605	5455	0.954812	1.93833	1.47383e-05
sced	FBgn0013732	785.33	0.954731	1.93822	0.0232559
Lgr1	FBgn0016650	1248.03	0.953186	1.93614	0.0072023
yki	FBgn0034970	1302.88	0.950062	1.93196	0.000525553
CG11710	FBgn0031115	600.565	0.949211	1.93082	0.0403812
side-VII	FBgn0037736	4199.48	0.947909	1.92907	8.66768e-05
CG30419	FBgn0050419	2116.64	0.945697	1.92612	3.51059e-06
Nlg1	FBgn0051146	1277.02	0.94257	1.92195	0.00542034
CG5326	FBgn0038983	1590.6	0.942413	1.92174	0.0039146
scf	FBgn0025682	1034.08	0.940195	1.91879	0.000145359
CG5867	FBgn0027586	1692.57	0.939644	1.91805	2.43081e-07
Bx	FBgn0265598	22155.7	0.936563	1.91396	8.33879e-21
CG5466	FBgn0038815	1149.29	0.933351	1.90971	0.0110998
trn	FBgn0010452	1348.6	0.933308	1.90965	0.00712983
Trpm	FBgn0265194	15802.7	0.929877	1.90511	2.59533e-13
bru2	FBgn0262475	9269.47	0.927996	1.90263	1.23212e-05
CG42402	FBgn0259821	16430.7	0.927285	1.90169	7.2888e-11
Vha36-1	FBgn0022097	842.07	0.923692	1.89696	0.00168043
Octbeta1R	FBgn0038980	7859.21	0.923149	1.89625	1.71881e-09
CG11319	FBgn0031835	27147.6	0.921904	1.89461	1.00955e-18
Pka-R1	FBgn0259243	13681.4	0.92187	1.89457	8.33786e-29
alphaTub84B	FBgn0003884	5919.88	0.921507	1.89409	5.88889e-05
Mhc	FBgn0264695	39477.2	0.920938	1.89335	1.02415e-06
tn	FBgn0265356	3173.81	0.915009	1.88558	0.000577665
CCKLR-17D3	FBgn0030954	755.352	0.913672	1.88383	0.0339558
tamo	FBgn0041582	3284.29	0.912768	1.88265	8.3678e-11
Pkcdelta	FBgn0259680	4048.08	0.911854	1.88146	0.000259598
bt	FBgn0005666	60507.8	0.911572	1.88109	9.43281e-07
CG10132	FBgn0032798	3402.55	0.910175	1.87927	4.19569e-18
sls	FBgn0086906	95335.9	0.905942	1.87377	8.73124e-07
CG12531	FBgn0031064	12449.4	0.904841	1.87234	1.8236e-12
Sec23	FBgn0262125	1976.46	0.902391	1.86916	1.44621e-06
Arc1	FBgn0033926	3218.79	0.899754	1.86575	0.000183609
CG43897	FBgn0264489	15496.2	0.896715	1.86182	8.03635e-06
CG33090	FBgn0028916	1625.73	0.893502	1.85768	0.00647653
MICAL-like	FBgn0036333	1559.52	0.893389	1.85753	3.10229e-06
Mlc1	FBgn0002772	1923.24	0.893283	1.8574	0.00395255
corn	FBgn0259173	4652.57	0.891683	1.85534	5.80705e-09
SERCA	FBgn0263006	34557.8	0.889182	1.85213	2.96348e-06
sca	FBgn0003326	1747.97	0.888075	1.8507	0.00559993
CCT2	FBgn0030086	828.395	0.88516	1.84697	0.0350583
CG6765	FBgn0035903	2532.98	0.884493	1.84612	3.77036e-10
Prp3	FBgn0036915	756.004	0.876308	1.83567	0.000213327
Cka	FBgn0044323	393.773	0.87525	1.83433	0.00831942
Act57B	FBgn0000044	6645.49	0.869182	1.82663	0.000128205
Sc2	FBgn0035471	763.627	0.868206	1.82539	0.00263616
dl	FBgn0260632	5128.62	0.859232	1.81407	5.59014e-06
eIF3e	FBgn0025582	684.696	0.857999	1.81252	0.00253786
CG5937	FBgn0029834	4895.02	0.85717	1.81148	9.77269e-12
Ctr9	FBgn0035205	1861.35	0.856424	1.81054	0.00680179
wupA	FBgn0004028	5305.54	0.855317	1.80916	0.000322831
Act87E	FBgn0000046	3474.65	0.853151	1.80644	0.00118426
Tm2	FBgn0004117	3822.41	0.850321	1.8029	0.00094332
CG42588	FBgn0260965	2850.41	0.850078	1.8026	0.000125747
Usp1	FBgn0028476	2732.12	0.849904	1.80238	2.04485e-08
14-3-3zeta	FBgn0004907	37542.1	0.84601	1.79752	1.41987e-08
Rbf	FBgn0015799	1183.57	0.845875	1.79735	0.000889561
Imp	FBgn0262735	12515.8	0.845645	1.79707	1.49157e-08
Mer	FBgn0086384	800.156	0.845245	1.79657	0.0100599
CG12219	FBgn0043796	360.094	0.841488	1.7919	0.0475785
Ran	FBgn0020255	1981.57	0.837581	1.78705	0.00220145
LeuRS	FBgn0053123	874.627	0.835763	1.7848	0.0136654
kraken	FBgn0020545	596.651	0.833851	1.78244	0.0328199
CG12194	FBgn0031636	2007.64	0.828816	1.77623	1.47031e-06
wda	FBgn0039067	370.534	0.826164	1.77296	0.0123327
CG44247	FBgn0265182	17691.4	0.823249	1.76939	1.43647e-06
snz	FBgn0029976	2607.14	0.820069	1.76549	1.04925e-17
CG32547	FBgn0052547	2613.33	0.818834	1.76398	2.93041e-06
cora	FBgn0010434	13294.2	0.818641	1.76374	1.90778e-37
wmd	FBgn0034876	1427.74	0.818285	1.76331	4.97613e-08
Gfrl	FBgn0262869	46530.1	0.817845	1.76277	8.83489e-11
CG15628	FBgn0031632	6309.85	0.817796	1.76271	6.09537e-06
axed	FBgn0035708	2613.73	0.809579	1.7527	0.00294993
CG4133	FBgn0031257	1451.61	0.809497	1.7526	9.13122e-06
AlaRS	FBgn0027094	959.667	0.809086	1.7521	0.00973496
CG5805	FBgn0039223	995.332	0.806152	1.74854	0.00481551
Syngr	FBgn0033876	6230.68	0.799993	1.74109	3.18469e-06
CG14215	FBgn0031052	1515.26	0.797735	1.73837	0.00160186
Act79B	FBgn0000045	3796.59	0.79736	1.73792	0.0022134
CG8728	FBgn0033235	832.604	0.792503	1.73208	0.00296247
CG7985	FBgn0028499	2637.6	0.792193	1.7317	3.5173e-06
CG9175	FBgn0031779	666.334	0.790618	1.72981	0.0309804
Lrrk	FBgn0038816	3055.56	0.789634	1.72864	0.000894941
smt3	FBgn0264922	1084.8	0.78623	1.72456	0.04343
CG8726	FBgn0033244	1429.63	0.785822	1.72407	0.0269391
CG42390	FBgn0259736	3780.03	0.784787	1.72284	0.000796588
Mef2	FBgn0011656	20416.2	0.783985	1.72188	3.04577e-11
eIF2gamma	FBgn0263740	762.553	0.781528	1.71895	0.00276457
Rab26	FBgn0086913	6762.03	0.774089	1.71011	1.72248e-09
ND-75	FBgn0017566	3783.29	0.7714	1.70692	0.00119751
mAChR-B	FBgn0037546	7290.84	0.769735	1.70496	3.19313e-12
DUBAI	FBgn0033738	1644.02	0.768526	1.70353	0.0236785
MED23	FBgn0034795	545.956	0.7684	1.70338	1.01527e-05
Ppr-Y	FBgn0046697	568146	0.768048	1.70296	3.47984e-05
7B2	FBgn0041707	2259.63	0.764217	1.69845	0.000837969
plx	FBgn0261261	9316.1	0.764039	1.69824	9.29141e-08
mip120	FBgn0033846	1017.48	0.763369	1.69745	7.25765e-06
PICK1	FBgn0032447	792.591	0.761603	1.69537	0.00751704
tow	FBgn0035719	4054.79	0.761124	1.69481	0.00324632
bma	FBgn0085385	10208	0.755947	1.68874	6.8779e-11
nAChRalpha2	FBgn0000039	1435.23	0.755934	1.68872	0.00106591
sr	FBgn0003499	4408.17	0.75236	1.68455	0.000916775
Zasp66	FBgn0035917	6205.4	0.752296	1.68447	0.00145623
Plc21C	FBgn0004611	20936.2	0.750552	1.68244	3.38881e-15
Picot	FBgn0024315	1764.26	0.749839	1.68161	0.00144928
Ent3	FBgn0036319	1619.29	0.739885	1.67004	5.00759e-06
spab	FBgn0033358	1095.93	0.739247	1.6693	0.00150729
RpS30	FBgn0038834	1496.97	0.738141	1.66803	0.0370798
HERC2	FBgn0031107	12991.6	0.737237	1.66698	3.57848e-05
Patr-1	FBgn0266053	1468.18	0.734652	1.664	6.44975e-05
CG10947	FBgn0032857	2802.49	0.732869	1.66194	8.66768e-05
MAN1	FBgn0034962	679.243	0.732406	1.66141	0.0281634
CG13124	FBgn0032156	4968.31	0.730514	1.65923	0.00299283
sl	FBgn0003416	910.199	0.730405	1.6591	0.000366257
CG9426	FBgn0032485	845.538	0.730136	1.6588	0.0290705
brat	FBgn0010300	13586	0.729488	1.65805	9.00214e-12
Mical	FBgn0053208	24041.6	0.727626	1.65591	8.34762e-16
Ranbp21	FBgn0031051	1235.09	0.726465	1.65458	0.0490619
CG42404	FBgn0259823	4189.75	0.724471	1.65229	0.00423286
Strn-Mlck	FBgn0265045	9912.56	0.724219	1.65201	0.00102914
rk	FBgn0003255	1061.55	0.72381	1.65154	0.0102256
snRNA:7SK	FBgn0065099	4051.35	0.723229	1.65087	0.00572238
CG3838	FBgn0032130	904.497	0.722354	1.64987	0.00713103
CG12236	FBgn0029822	2085.96	0.721746	1.64918	0.00308902
P58IPK	FBgn0037718	1191.63	0.720269	1.64749	0.00111554
mib2	FBgn0086442	1936.28	0.719882	1.64705	0.0276439
CG17360	FBgn0037949	4600.38	0.716721	1.64344	2.06577e-11
Kr-h2	FBgn0266449	1242.31	0.71263	1.63879	0.000891433
CG17593	FBgn0031544	1334.94	0.711015	1.63695	0.0196265
Nup98-96	FBgn0039120	2006.98	0.708171	1.63373	0.000403282
PEK	FBgn0037327	1917.9	0.707596	1.63308	1.7593e-05
CG4230	FBgn0031683	1966.7	0.705659	1.63089	6.50763e-10
CG14234	FBgn0031065	2884.24	0.704944	1.63008	0.0146019
exd	FBgn0000611	1895.5	0.704456	1.62953	0.0328199
comm	FBgn0010105	2053.72	0.704188	1.62923	0.022954
CG12004	FBgn0035236	2984.19	0.702098	1.62687	0.00147155
dock	FBgn0010583	4679.94	0.700902	1.62552	0.00592443
knrl	FBgn0001323	2410.02	0.69786	1.6221	0.00118426
CG6734	FBgn0032395	1152.55	0.696578	1.62066	0.000583894
drosha	FBgn0026722	811.912	0.696337	1.62039	0.000238997
Fife	FBgn0264606	23313.2	0.695673	1.61964	1.51208e-09
CG42817	FBgn0261999	2457.79	0.695622	1.61958	3.27849e-05
CG30389	FBgn0050389	9599.15	0.694805	1.61867	1.65494e-08
Sirt1	FBgn0024291	2369.39	0.692521	1.61611	0.000151355
CG3815	FBgn0029861	486.105	0.691621	1.6151	0.0258718
Ns4	FBgn0032882	570.825	0.690609	1.61396	0.0267688
kl-5	FBgn0267433	111728	0.684181	1.60679	0.000369061
Rbp	FBgn0262483	35097.3	0.683301	1.60581	2.56166e-10
CG10019	FBgn0031568	2723.22	0.680956	1.6032	0.0029849
PTP-ER	FBgn0016641	2454.76	0.678098	1.60003	0.00040803
FeCH	FBgn0266268	486.595	0.678072	1.6	0.032901
c11.1	FBgn0040236	2838.52	0.676587	1.59835	3.50843e-07
Sbf	FBgn0025802	2011.42	0.676585	1.59835	5.85405e-05
GluRIA	FBgn0004619	2027.8	0.67565	1.59732	8.66768e-05
Sfmbt	FBgn0032475	1761.12	0.67526	1.59688	0.0434169
Vha68-1	FBgn0265262	3842.51	0.674192	1.5957	0.00111472
Asph	FBgn0034075	2446.72	0.673237	1.59465	0.0287673
Dhc64C	FBgn0261797	14117.7	0.669481	1.5905	1.35989e-06
Rpt3	FBgn0028686	729.388	0.666209	1.5869	0.0412071
Pp2A-29B	FBgn0260439	3000.42	0.665775	1.58642	0.000839828
CG1674	FBgn0039897	3188.14	0.665424	1.58603	0.0195398
Wnt6	FBgn0031902	598.902	0.663935	1.5844	0.0116953
sol	FBgn0003464	3456.24	0.661817	1.58207	0.000202818
CG4577	FBgn0031306	14385.4	0.661039	1.58122	0.000201729
5-HT1A	FBgn0004168	10644	0.660295	1.58041	0.000283452
trv	FBgn0085391	28782.4	0.660282	1.58039	1.29974e-06
fax	FBgn0014163	11265.1	0.658968	1.57895	9.7429e-05
CG32506	FBgn0052506	5219.46	0.657661	1.57752	3.70092e-05
pnut	FBgn0013726	1844.09	0.657486	1.57733	0.0019591
H	FBgn0001169	2010.42	0.656372	1.57611	0.00179152
kek1	FBgn0015399	7326.72	0.656194	1.57592	3.86493e-06
CG6227	FBgn0030631	949.899	0.654758	1.57435	0.000343883
dnc	FBgn0000479	40888	0.653793	1.5733	2.08946e-08
unc-5	FBgn0034013	3117.02	0.65154	1.57084	0.000149535
Taf2	FBgn0011836	563.106	0.648754	1.56781	0.0179324
Dif	FBgn0011274	8421.12	0.648666	1.56772	0.000694593
Pde8	FBgn0266377	9999.53	0.648315	1.56734	8.60715e-13
CG11388	FBgn0034959	1013.16	0.648294	1.56731	0.045059
ema	FBgn0038427	1199.45	0.648004	1.567	0.00112625
Mlc2	FBgn0002773	6567.8	0.647438	1.56638	0.0072817
CCT8	FBgn0033342	899.705	0.647372	1.56631	0.0316855
CG32772	FBgn0052772	1841.58	0.645078	1.56382	0.00425871
CG1504	FBgn0031100	866.284	0.644077	1.56274	0.0453056
CG16952	FBgn0030701	2185.12	0.643873	1.56252	0.0456989
CG3530	FBgn0028497	3216.02	0.639649	1.55795	0.0260598
chrb	FBgn0036165	23704.1	0.639243	1.55751	0.000146005
Pkc53E	FBgn0003091	20956.9	0.637917	1.55608	6.78181e-10
RpS26	FBgn0261597	2373.24	0.63751	1.55564	0.042683
Alk	FBgn0040505	14582.3	0.635257	1.55321	9.7236e-17
CG14186	FBgn0036935	4664.7	0.633081	1.55087	0.001096
CG5823	FBgn0038515	1131.47	0.630039	1.54761	0.0119891
CG9801	FBgn0037623	2505.71	0.625614	1.54287	0.0440704
CG43102	FBgn0262562	5731.66	0.624451	1.54162	3.21925e-08
Smg5	FBgn0019890	3298.53	0.620946	1.53788	0.0143019
CoRest	FBgn0261573	3314.75	0.619197	1.53602	0.0309804
stai	FBgn0266521	8891.62	0.61694	1.53362	2.33736e-08
Hsp60A	FBgn0015245	3212.99	0.615867	1.53248	0.0334785
Pka-C3	FBgn0000489	4567.7	0.613838	1.53032	1.23726e-08
kay	FBgn0001297	14853.6	0.613693	1.53017	0.00463794
unc-104	FBgn0267002	39867.1	0.610958	1.52727	2.06265e-08
dpr12	FBgn0085414	24227.2	0.610801	1.52711	0.000450519
Xbp1	FBgn0021872	7353.91	0.609295	1.52551	0.000372046
Cep97	FBgn0031575	798.289	0.608341	1.52451	0.0219396
CG34357	FBgn0085386	14912.9	0.607888	1.52403	8.01188e-06
dsh	FBgn0000499	1102.31	0.605458	1.52146	0.0126778
MKP-4	FBgn0031044	572.122	0.601306	1.51709	9.32067e-05
Tpi	FBgn0086355	2410.28	0.600206	1.51593	0.0020117
olf413	FBgn0037153	26605.9	0.599427	1.51511	1.41101e-08
l(1)G0320	FBgn0028327	3055.29	0.597247	1.51283	0.00815214
Smurf	FBgn0029006	5592.31	0.595049	1.51052	4.62288e-12
CG1317	FBgn0035333	3409.94	0.59501	1.51048	6.67527e-05
AP-1-2beta	FBgn0010380	2201.09	0.592086	1.50742	0.0159054
CG31122	FBgn0051122	2540.41	0.590986	1.50628	1.39285e-06
futsch	FBgn0259108	78277.7	0.590212	1.50547	4.10883e-10
stc	FBgn0001978	1610.54	0.589594	1.50482	0.0280347
ash1	FBgn0005386	3306.05	0.589443	1.50467	8.88145e-06
Acon	FBgn0010100	9696.5	0.587285	1.50242	0.00226076
CalpA	FBgn0012051	1719.39	0.585446	1.5005	0.013286
CG1737	FBgn0030293	1907.63	0.583858	1.49885	0.00606302
CG3618	FBgn0037028	2038.04	0.582883	1.49784	0.00545279
cib	FBgn0026084	2488.19	0.581951	1.49687	0.0191177
mt:srRNA	FBgn0013688	12330	0.581023	1.49591	0.00963065
RSG7	FBgn0024941	5181.06	0.580113	1.49497	0.018705
beta-Spec	FBgn0250788	16738.1	0.578798	1.4936	2.53702e-05
ORY	FBgn0046323	305398	0.578128	1.49291	0.0032547
Drp1	FBgn0026479	1849.47	0.577604	1.49237	0.0317804
CG11317	FBgn0039816	3808.61	0.577572	1.49234	0.0397471
CG6154	FBgn0039420	2272.36	0.575895	1.4906	0.0036721
Rgk2	FBgn0085419	1722.21	0.574991	1.48967	0.0141011
Gs1l	FBgn0019982	806.251	0.572056	1.48664	0.032984
CG3703	FBgn0040348	1055.42	0.571676	1.48625	0.00049597
Smox	FBgn0025800	4590.55	0.569201	1.4837	0.00502392
Rab3	FBgn0005586	10928.9	0.565505	1.47991	0.00277404
CG9170	FBgn0030716	6598.51	0.564371	1.47874	4.07049e-07
GluRIB	FBgn0264000	8148.97	0.563497	1.47785	5.42937e-07
row	FBgn0033998	1871.22	0.563483	1.47783	0.00350839
X11L	FBgn0026313	4622.01	0.56311	1.47745	0.00149584
Apc	FBgn0015589	6025.87	0.56303	1.47737	0.00345865
btz	FBgn0045862	1603.35	0.562193	1.47651	0.0267144
Xrp1	FBgn0261113	28659.1	0.559489	1.47375	9.82394e-05
dpr9	FBgn0038282	9621.07	0.558704	1.47295	1.29803e-07
Golgin245	FBgn0034854	2949.96	0.557886	1.47211	0.00124463
CG2926	FBgn0037344	7938.71	0.557519	1.47174	0.000469929
Chc	FBgn0000319	5806.84	0.557366	1.47158	0.0261393
CG30463	FBgn0050463	9394.35	0.556726	1.47093	0.000472674
CG4612	FBgn0035016	8755.14	0.556027	1.47022	0.0196265
Sos	FBgn0001965	3041.46	0.555744	1.46993	0.00158554
lncRNA:CR44024	FBgn0264794	4053.82	0.554737	1.4689	8.57339e-05
CG7378	FBgn0030976	6396.68	0.554463	1.46862	0.00546119
CG9297	FBgn0038181	17556.8	0.55209	1.46621	0.0115741
up	FBgn0004169	9177.99	0.551998	1.46611	0.0198147
Act5C	FBgn0000042	16660.5	0.551666	1.46578	0.000168299
HPS4	FBgn0034261	2376.55	0.551595	1.4657	0.00859768
CG6282	FBgn0035914	5376.77	0.551081	1.46518	1.45111e-06
RpII215	FBgn0003277	2950.41	0.550567	1.46466	8.12495e-05
dome	FBgn0043903	2541.72	0.549716	1.4638	3.50686e-05
ChAT	FBgn0000303	2327.97	0.549389	1.46347	1.37364e-06
CG9425	FBgn0036451	10539.2	0.548057	1.46211	1.41532e-05
CG4768	FBgn0030790	1158.89	0.547425	1.46147	0.0174819
NaPi-III	FBgn0260795	9030.91	0.547129	1.46117	6.8827e-07
C3G	FBgn0259228	9510.44	0.546671	1.46071	9.77042e-16
CG44085	FBgn0264894	6594.49	0.544779	1.4588	0.027337
pcs	FBgn0033988	1169.43	0.542933	1.45693	0.0298135
Hmt-1	FBgn0038376	1201.52	0.54242	1.45641	0.0365542
CG30116	FBgn0028496	15657.1	0.541993	1.45598	5.64031e-11
Nep3	FBgn0031081	3356.76	0.540679	1.45466	0.00772479
rgn	FBgn0261258	5201	0.539942	1.45391	0.001497
jus	FBgn0015541	4894.93	0.539747	1.45372	0.00138611
CG12404	FBgn0032465	700.188	0.539651	1.45362	0.0396345
CG17816	FBgn0037525	36798.6	0.538436	1.4524	0.00139272
CG42699	FBgn0261610	1620.52	0.537724	1.45168	0.0435637
l(2)01289	FBgn0010482	5575.46	0.537559	1.45151	0.0396345
brm	FBgn0000212	4193.82	0.534071	1.44801	0.00362401
CG31814	FBgn0051814	5006.5	0.53342	1.44736	0.00865532
Appl	FBgn0000108	79122.9	0.532151	1.44608	2.74612e-07
syd	FBgn0024187	5605.12	0.531929	1.44586	1.20919e-05
PAPLA1	FBgn0031990	8074.75	0.531648	1.44558	0.001096
fid	FBgn0259146	2632.42	0.5282	1.44213	0.0238559
Fs(2)Ket	FBgn0262743	9764.36	0.527691	1.44162	2.20658e-06
CG32243	FBgn0052243	477.446	0.525951	1.43988	0.045059
Mi-2	FBgn0262519	5203.99	0.524911	1.43884	2.75506e-05
CG11399	FBgn0037021	2867.72	0.524007	1.43794	0.00033296
dbo	FBgn0040230	1902.78	0.523307	1.43725	0.00600251
jp	FBgn0032129	8707.74	0.522045	1.43599	0.000102512
koi	FBgn0265003	1714.11	0.520807	1.43476	0.0423764
kek4	FBgn0032484	857.61	0.519248	1.43321	0.0385459
Mkk4	FBgn0024326	3195.83	0.517567	1.43154	0.0328008
DCTN1-p150	FBgn0001108	1860.83	0.517475	1.43145	2.6642e-05
Bap170	FBgn0042085	1668.27	0.516659	1.43064	0.00724495
foi	FBgn0024236	2948.69	0.516411	1.43039	0.00832507
CG45263	FBgn0266801	64431.5	0.516315	1.4303	8.13508e-06
Spt20	FBgn0036374	3678.38	0.516225	1.43021	0.0393681
GlcAT-P	FBgn0036144	8792.84	0.516012	1.43	0.001096
Galphas	FBgn0001123	2728.32	0.515835	1.42982	0.000102847
CG32815	FBgn0052815	2244.41	0.515425	1.42942	0.0042673
CG13887	FBgn0035165	2414.09	0.514319	1.42832	0.0123833
sdt	FBgn0261873	26523.7	0.511113	1.42515	3.44173e-07
CG9646	FBgn0034184	2943.9	0.510714	1.42476	0.00298554
Tsp96F	FBgn0027865	3286	0.510576	1.42462	0.000582262
Ack-like	FBgn0263998	3148.87	0.509101	1.42316	0.00292597
Rab35	FBgn0031090	2730.05	0.508856	1.42292	0.0078633
eIF3c	FBgn0034258	3028.46	0.508528	1.4226	0.0123619
CG42324	FBgn0259224	13084.9	0.505887	1.42	7.75343e-05
CG4502	FBgn0031896	3182.79	0.504954	1.41908	0.00296247
CG12605	FBgn0035481	16435.1	0.503889	1.41803	0.0255645
AP-2mu	FBgn0263351	1358.1	0.503226	1.41738	0.0176413
hiw	FBgn0030600	15141.2	0.502492	1.41666	0.00263849
CG14764	FBgn0033236	2399.86	0.501789	1.41597	2.59842e-06
CG7956	FBgn0038890	1759	0.501395	1.41558	0.00310611
CG31650	FBgn0031673	802.149	0.500866	1.41506	0.0132444
Lis-1	FBgn0015754	5962.46	0.500543	1.41475	0.000165762
CG16711	FBgn0036032	5830.75	0.498903	1.41314	1.10203e-05
fru	FBgn0004652	41113.9	0.49702	1.4113	0.001096
nAChRalpha1	FBgn0000036	22167.1	0.496985	1.41126	4.08268e-06
Gdi	FBgn0004868	3171.65	0.495792	1.41009	0.0129935
Dlg5	FBgn0032363	3504.64	0.495006	1.40933	0.00811741
CG9279	FBgn0036882	2344.45	0.494033	1.40838	0.00121179
CG8858	FBgn0033698	1235.42	0.492283	1.40667	0.0369194
da	FBgn0000413	2720.57	0.492233	1.40662	0.00021629
cmpy	FBgn0037015	2009.25	0.49208	1.40647	0.0311457
FBXO11	FBgn0037760	3761.85	0.491438	1.40585	0.0310339
EbpIII	FBgn0011695	7955.55	0.490387	1.40482	0.0250842
oys	FBgn0033476	4955.05	0.489149	1.40362	0.00679358
CG14762	FBgn0033250	15639.4	0.488453	1.40294	1.29403e-06
CG13650	FBgn0039277	1523.26	0.487081	1.40161	0.0147116
Dhit	FBgn0028743	5569.1	0.486539	1.40108	0.00302077
CG7518	FBgn0038108	4385.35	0.484768	1.39936	0.0017277
side-II	FBgn0259213	16793.7	0.483579	1.39821	0.0330028
ATPsynD	FBgn0016120	1733.24	0.481022	1.39573	0.0309804
EloA	FBgn0039066	989.602	0.48102	1.39573	0.0304234
Pi3K68D	FBgn0015278	2665.06	0.480826	1.39554	0.0252028
Cdk5alpha	FBgn0027491	3430.87	0.480325	1.39506	0.00113853
CG31064	FBgn0051064	3036.03	0.478516	1.39331	0.00104621
jbug	FBgn0028371	7371.07	0.477329	1.39216	0.0380831
unc-13-4A	FBgn0035756	9335.87	0.476817	1.39167	0.0105761
wge	FBgn0051151	6556.2	0.473704	1.38867	4.67925e-11
wry	FBgn0051665	16797.1	0.472635	1.38764	1.01366e-06
bsf	FBgn0032679	1770.05	0.472364	1.38738	0.0290705
swm	FBgn0002044	2894.13	0.471154	1.38622	2.2189e-06
Sdr	FBgn0038279	751.045	0.469204	1.38435	0.00939345
mxt	FBgn0031637	3290.06	0.459636	1.37519	0.00113295
CG1513	FBgn0033463	5648.15	0.453684	1.36953	4.31586e-08
CG7781	FBgn0032021	5166.88	0.452818	1.36871	0.00202108
lid	FBgn0031759	5723.21	0.452585	1.36849	9.42635e-06
Ten-a	FBgn0267001	75308.3	0.451248	1.36722	0.00123652
SRPK	FBgn0026370	6847.49	0.451218	1.36719	0.000130353
PlexA	FBgn0025741	19054.7	0.449448	1.36552	0.000165398
Spred	FBgn0020767	8735.29	0.44605	1.36231	0.00152119
SdhA	FBgn0261439	5084.85	0.444724	1.36105	0.0301422
Nup358	FBgn0039302	5382.91	0.444357	1.36071	0.00190806
Rop	FBgn0004574	4322.94	0.442764	1.35921	0.0402104
CG31140	FBgn0051140	23423.7	0.440887	1.35744	5.82113e-07
stau	FBgn0003520	8498.77	0.440853	1.35741	0.000646088
cher	FBgn0014141	4077.92	0.43989	1.3565	0.00454228
CG43737	FBgn0263994	9157.64	0.439782	1.3564	1.00797e-07
CG15099	FBgn0034400	4228.7	0.438334	1.35504	0.0431708
phol	FBgn0035997	1342.53	0.436216	1.35305	0.00650579
na	FBgn0002917	6333.28	0.434972	1.35188	0.00625073
miple1	FBgn0027111	7477.87	0.433081	1.35011	0.0162657
CG9636	FBgn0037556	2023.69	0.432925	1.34997	0.0293716
Task6	FBgn0038165	5890.82	0.430443	1.34765	0.0306824
CG5098	FBgn0034300	4087.63	0.428952	1.34626	0.0303768
Ccn	FBgn0052183	7781.88	0.428696	1.34602	0.000694593
CG42788	FBgn0261859	12464.5	0.428648	1.34597	1.20919e-05
CG10321	FBgn0034643	2097.79	0.425946	1.34345	0.00277404
ph-d	FBgn0004860	2235.82	0.425345	1.34289	0.0399743
htk	FBgn0085451	3241.99	0.424829	1.34241	0.0291494
CG10737	FBgn0034420	7049.4	0.424536	1.34214	0.0215158
Dap160	FBgn0023388	8233.13	0.421974	1.33976	5.00759e-06
CG10413	FBgn0032689	985.035	0.421012	1.33887	0.0311745
Pkc98E	FBgn0003093	14284.4	0.419026	1.33702	0.0203879
Vps13	FBgn0033194	4281.83	0.417635	1.33574	0.000162418
mAChR-A	FBgn0000037	6947.6	0.415649	1.3339	0.009479
Dscam1	FBgn0033159	14380.2	0.41369	1.33209	0.0027905
Rgl	FBgn0026376	4912.06	0.412946	1.3314	0.000680153
chb	FBgn0021760	3475.11	0.412358	1.33086	0.00391601
kuz	FBgn0259984	14817.7	0.409641	1.32836	0.00265201
CG7990	FBgn0030997	4719.91	0.408418	1.32723	0.0040917
Ubr3	FBgn0260970	6465.34	0.408194	1.32702	0.00277404
Toll-7	FBgn0034476	3350.91	0.4079	1.32675	0.00268111
Tg	FBgn0031975	752.202	0.406932	1.32586	0.034458
Ald	FBgn0000064	26379.9	0.405327	1.32439	0.0143378
Unc-76	FBgn0040395	7110.38	0.404878	1.32398	0.00136538
trio	FBgn0024277	20757.8	0.404516	1.32365	3.11627e-05
CG17321	FBgn0032719	2806.43	0.404136	1.3233	0.0232806
betaCOP	FBgn0008635	1672.3	0.401422	1.32081	0.0446405
Myb	FBgn0002914	1176.83	0.401407	1.3208	0.0291494
Dab	FBgn0000414	11386.9	0.397517	1.31724	0.00315981
ckn	FBgn0033987	5563.73	0.395105	1.31504	0.037162
fliI	FBgn0000709	1459.1	0.39256	1.31272	0.0261393
CG33523	FBgn0053523	1969.5	0.391931	1.31215	0.0176549
CG42322	FBgn0259222	12529	0.391634	1.31188	0.032984
zormin	FBgn0052311	12782.7	0.390115	1.3105	0.0311029
CG8086	FBgn0032010	8933.8	0.389855	1.31026	0.000206361
muc	FBgn0031912	2931.46	0.388076	1.30865	0.00672477
Cirl	FBgn0033313	24745	0.386139	1.30689	0.0105567
Jarid2	FBgn0036004	7380.25	0.386032	1.30679	4.82646e-05
flfl	FBgn0024555	5621.78	0.384644	1.30554	6.31119e-06
CG18812	FBgn0042135	15084.9	0.383988	1.30494	2.30206e-08
Myo81F	FBgn0267431	34551	0.379244	1.30066	0.0397471
Nlg3	FBgn0083963	20003	0.378593	1.30007	0.00672477
CG14441	FBgn0029895	6964.59	-0.381216	0.76779	0.00180535
CG3714	FBgn0031589	3408.01	-0.381411	0.767686	0.0180075
BuGZ	FBgn0032600	8727.67	-0.381896	0.767428	0.00153893
p130CAS	FBgn0035101	2931.6	-0.382453	0.767132	0.0109893
alpha-Man-Ia	FBgn0259170	11648.5	-0.383043	0.766819	0.00291824
Pli	FBgn0025574	8121.29	-0.385248	0.765648	5.98047e-05
ced-6	FBgn0029092	3103.96	-0.387243	0.764589	0.0120097
SP2637	FBgn0034371	3658.39	-0.387955	0.764212	0.0385672
Tango13	FBgn0086674	5087.75	-0.38798	0.764199	0.0113222
Dad	FBgn0020493	4728.84	-0.389386	0.763454	0.0222113
par-1	FBgn0260934	31802	-0.39575	0.760094	0.00232379
Ac3	FBgn0023416	5772.23	-0.402214	0.756696	0.00659276
Vha44	FBgn0262511	11668	-0.403322	0.756115	0.0311745
orb	FBgn0004882	4001.51	-0.406089	0.754667	0.0407864
CG6700	FBgn0032305	11100.1	-0.40812	0.753605	0.00565407
PRL-1	FBgn0024734	11925.6	-0.408752	0.753275	0.0198147
inaE	FBgn0261244	8605.85	-0.40893	0.753182	0.000171267
lncRNA:CR44997	FBgn0266348	14583.7	-0.413977	0.750552	0.00484384
shn	FBgn0003396	12860	-0.415364	0.749831	0.000403282
MFS17	FBgn0058263	36775	-0.415794	0.749607	0.0143
CG14431	FBgn0029922	4944.47	-0.416732	0.74912	0.0179873
hoe1	FBgn0041150	7256.44	-0.418806	0.748043	0.023952
CG32486	FBgn0266918	9074.47	-0.418937	0.747976	0.0276496
Chd64	FBgn0035499	3196.09	-0.421113	0.746848	0.0125648
CG8475	FBgn0031995	2174.92	-0.422352	0.746207	0.021592
CG15630	FBgn0031627	11324.3	-0.422358	0.746204	0.0396345
MYPT-75D	FBgn0036801	6622.46	-0.428431	0.743069	0.0036793
Cda5	FBgn0051973	12260.6	-0.430672	0.741916	0.0122551
CG15431	FBgn0031602	7094.58	-0.430743	0.74188	0.00437688
drpr	FBgn0027594	3037.71	-0.431794	0.741339	0.00939345
CG6767	FBgn0036030	11605.4	-0.432545	0.740954	0.000324468
gpp	FBgn0264495	22696.2	-0.43259	0.740931	1.50897e-08
Actbeta	FBgn0024913	4813.47	-0.438902	0.737696	0.0291494
Cadps	FBgn0053653	39412	-0.439463	0.737409	0.000400818
CG32647	FBgn0052647	14106.4	-0.43986	0.737206	0.0267144
lncRNA:roX1	FBgn0019661	107689	-0.443398	0.735401	5.62052e-06
rl	FBgn0003256	17623.5	-0.444231	0.734976	0.000146005
Dyrk3	FBgn0027101	8162.39	-0.44667	0.733734	3.48365e-05
Hnf4	FBgn0004914	3821.86	-0.447772	0.733174	0.0048916
Cad87A	FBgn0037963	3495.31	-0.449905	0.732091	0.0203908
CG17493	FBgn0040010	1789.41	-0.450212	0.731935	0.00868111
VGlut	FBgn0031424	8483.39	-0.450736	0.73167	0.0206198
NaCP60E	FBgn0085434	44017.4	-0.450766	0.731654	0.00816429
numb	FBgn0002973	4501.95	-0.453928	0.730052	0.00154414
dpr6	FBgn0040823	13025.3	-0.45446	0.729783	0.00424029
chinmo	FBgn0086758	16983.1	-0.456605	0.728699	6.10828e-06
Pde6	FBgn0038237	8598.98	-0.458237	0.727875	0.000234092
Stlk	FBgn0046692	5465.12	-0.4585	0.727742	0.0111341
CG32683	FBgn0052683	4154.85	-0.458975	0.727503	0.0351087
sn	FBgn0003447	3633.98	-0.461	0.726482	0.000295464
shep	FBgn0052423	84334	-0.464089	0.724929	0.000319694
EDTP	FBgn0027506	2967.86	-0.464421	0.724762	0.0213641
Snoo	FBgn0085450	20954.3	-0.46644	0.723748	2.1166e-05
CG3961	FBgn0036821	4620.85	-0.467531	0.723201	1.13029e-05
Svil	FBgn0266696	29263.2	-0.467745	0.723094	0.00115318
CG41520	FBgn0087011	6430.25	-0.468926	0.722502	0.00745423
CG9990	FBgn0039594	4486.29	-0.470894	0.721518	0.0301749
ed	FBgn0000547	14402.8	-0.472119	0.720905	6.28255e-05
lncRNA:CR44206	FBgn0265104	3770.35	-0.473191	0.72037	0.0238559
Sh	FBgn0003380	192476	-0.474009	0.719961	0.0220406
CHKov1	FBgn0045761	3134.42	-0.475797	0.71907	0.00613199
nrm	FBgn0262509	22705.6	-0.477274	0.718334	0.00250775
CaMKI	FBgn0016126	18251.8	-0.4839	0.715042	0.00117464
beat-IIIb	FBgn0053179	3130.15	-0.484127	0.71493	0.0111311
hth	FBgn0001235	39977.3	-0.484461	0.714764	4.64506e-05
Swim	FBgn0034709	898.045	-0.485178	0.714409	0.0463427
shg	FBgn0003391	3408.49	-0.486697	0.713657	0.00614799
CG34383	FBgn0085412	19075	-0.488092	0.712967	3.99844e-08
Dyrk2	FBgn0016930	10593.2	-0.488672	0.712681	1.15336e-05
Liprin-gamma	FBgn0034720	14834	-0.490268	0.711893	8.94383e-05
Tsf1	FBgn0022355	17253.2	-0.49075	0.711655	0.0297274
vn	FBgn0003984	3911.64	-0.491752	0.711161	0.0143378
Lim1	FBgn0026411	3635.43	-0.495128	0.709499	0.0135207
haf	FBgn0261509	3083.18	-0.495213	0.709457	0.02016
Btk29A	FBgn0003502	3487.76	-0.497409	0.708378	0.00175102
Ac13E	FBgn0022710	6853.44	-0.497665	0.708252	0.00554961
capu	FBgn0000256	4633.99	-0.497701	0.708235	0.000890116
sfl	FBgn0020251	11109.7	-0.500244	0.706987	0.00021629
Slik	FBgn0035001	10516.9	-0.504356	0.704975	1.99825e-06
Ttd14	FBgn0050118	8235.15	-0.505017	0.704652	2.23376e-11
SNF4Agamma	FBgn0264357	17813.3	-0.506536	0.703911	0.00215184
sif	FBgn0085447	129337	-0.512648	0.700935	6.29748e-05
CG5953	FBgn0032587	1633.64	-0.512886	0.700819	0.0385672
CG13366	FBgn0025633	3394	-0.513023	0.700753	0.0113587
CG42613	FBgn0261262	17514.1	-0.514575	0.699999	0.020822
Desat1	FBgn0086687	25358.4	-0.515766	0.699422	0.0168886
Ets98B	FBgn0005659	2873.44	-0.515894	0.699359	0.0398651
CG9932	FBgn0262160	46090.9	-0.516929	0.698858	0.000326543
CG6175	FBgn0036152	1205.27	-0.517408	0.698626	0.0440467
stw	FBgn0259247	3268.7	-0.517873	0.698401	0.00631134
nwk	FBgn0263456	14381.5	-0.519616	0.697558	1.19946e-06
Eip78C	FBgn0004865	5677.09	-0.520408	0.697175	0.000360118
AGO3	FBgn0250816	4405.73	-0.522918	0.695963	6.79069e-05
Tie	FBgn0014073	1987.76	-0.523655	0.695607	0.00185389
CG42750	FBgn0261804	24405.7	-0.524128	0.695379	1.24285e-05
ACC	FBgn0033246	25632.2	-0.524148	0.69537	0.0146019
Tao	FBgn0031030	9262.46	-0.525242	0.694842	8.36233e-05
Fhos	FBgn0266084	5694.38	-0.5257	0.694622	0.00812923
shakB	FBgn0085387	39720.6	-0.527659	0.69368	0.00418314
Pkn	FBgn0020621	7141.37	-0.531886	0.69165	1.37364e-06
gukh	FBgn0026239	2960.64	-0.533781	0.690742	0.000322831
CG42327	FBgn0259227	3427.65	-0.533962	0.690655	1.57898e-06
Syp	FBgn0038826	53850.7	-0.534032	0.690622	0.00804815
Piezo	FBgn0264953	5679.38	-0.534383	0.690454	0.00464117
Pvr	FBgn0032006	2909.01	-0.535188	0.690069	0.00158554
l(2)41Ab	FBgn0262123	2587.1	-0.535721	0.689814	0.0256711
Efa6	FBgn0051158	13242.8	-0.536445	0.689468	3.11631e-05
robo3	FBgn0041097	4218.53	-0.536974	0.689215	0.0050001
lncRNA:CR43459	FBgn0263413	12466.7	-0.537394	0.689014	0.00963065
Flo2	FBgn0264078	6807.93	-0.539725	0.687902	0.000518849
beat-Ia	FBgn0013433	2577.03	-0.540127	0.687711	0.0147934
CG3036	FBgn0031645	5577.3	-0.541087	0.687253	0.0380282
pk	FBgn0003090	1931.06	-0.541668	0.686976	0.00822564
eas	FBgn0000536	3376.87	-0.542296	0.686677	0.00113295
CG42389	FBgn0259735	26351.5	-0.544432	0.685661	1.55422e-06
lncRNA:let7C	FBgn0263049	4831.81	-0.547937	0.683997	0.00263362
CG5758	FBgn0032666	6718.17	-0.549542	0.683237	2.62894e-05
CG42492	FBgn0259994	32473.7	-0.550795	0.682644	2.616e-06
Eaat2	FBgn0026438	6319.76	-0.557327	0.67956	0.0276304
lncRNA:CR45054	FBgn0266414	19532.7	-0.558567	0.678976	7.28462e-05
Neto	FBgn0265416	2764.45	-0.56075	0.67795	0.00772479
wdp	FBgn0034718	2176.03	-0.562031	0.677348	2.67115e-05
ewg	FBgn0005427	4540.01	-0.564828	0.676036	2.9659e-05
SP2353	FBgn0034070	7512.07	-0.565886	0.67554	2.09611e-05
5-HT2A	FBgn0087012	5431.29	-0.567166	0.674941	0.00544172
Eip63E	FBgn0005640	24702	-0.567661	0.67471	3.58571e-05
dally	FBgn0263930	10599.7	-0.567934	0.674582	0.0136556
CG12163	FBgn0260462	4826.67	-0.568016	0.674544	0.00322068
CG10384	FBgn0034731	3521.9	-0.569703	0.673755	0.00340587
Nlg4	FBgn0083975	7137.11	-0.570836	0.673227	1.68426e-05
Gbs-70E	FBgn0036428	6686.77	-0.572669	0.672372	0.00646489
ps	FBgn0261552	92914.4	-0.573006	0.672215	6.06853e-08
comm3	FBgn0259236	1424.26	-0.573377	0.672042	0.0104796
Usp15-31	FBgn0050421	5101.96	-0.574018	0.671743	6.55827e-06
CG18067	FBgn0034512	8847.73	-0.574985	0.671293	0.0146363
DIP-delta	FBgn0085420	2826.58	-0.575324	0.671135	0.0454538
Syt1	FBgn0004242	79815.4	-0.576285	0.670689	0.000403282
fz2	FBgn0016797	17111	-0.57775	0.670008	3.37149e-05
CG5059	FBgn0037007	2939.16	-0.580992	0.668504	0.000139681
Ncc69	FBgn0036279	3675.62	-0.581679	0.668186	0.0398651
Sox14	FBgn0005612	1788.96	-0.582341	0.667879	9.6085e-08
foxo	FBgn0038197	6643.67	-0.585046	0.666628	0.00772764
Rab32	FBgn0002567	3969.71	-0.585593	0.666375	6.24072e-05
CG6910	FBgn0036262	3601.74	-0.585929	0.66622	0.0392556
eya	FBgn0000320	2276.62	-0.589783	0.664443	0.0012932
eag	FBgn0000535	16651.9	-0.590025	0.664332	4.61893e-05
Nedd4	FBgn0259174	6668.4	-0.591599	0.663607	3.03169e-10
CenG1A	FBgn0028509	6043.91	-0.591615	0.6636	0.0184143
Drak	FBgn0052666	10718.5	-0.59452	0.662265	0.000153235
Cht6	FBgn0263132	1208.26	-0.594931	0.662076	0.0166368
Fur1	FBgn0004509	21269.3	-0.59735	0.660967	2.40831e-06
osp	FBgn0003016	12063.2	-0.598936	0.660241	0.00251742
GluClalpha	FBgn0024963	39543.4	-0.59997	0.659767	0.00226315
NFAT	FBgn0030505	17216.8	-0.601399	0.659114	2.18358e-10
Wdr62	FBgn0031374	18096.8	-0.60173	0.658963	1.77148e-05
path	FBgn0036007	8232.89	-0.602449	0.658635	6.83937e-09
NK7.1	FBgn0024321	8966.05	-0.604445	0.657724	6.28876e-07
CG6356	FBgn0039178	1109.51	-0.606252	0.656901	0.000635709
Est-6	FBgn0000592	2809.65	-0.607509	0.656329	0.0445105
CG6426	FBgn0034162	696.309	-0.608545	0.655858	0.0297274
CG31705	FBgn0028490	5681.4	-0.612027	0.654277	0.00122025
Lsp1beta	FBgn0002563	5949.64	-0.6125	0.654062	0.0141011
CG32549	FBgn0052549	4988.56	-0.612502	0.654062	0.0182069
luna	FBgn0040765	9349.22	-0.613913	0.653422	2.17187e-06
l(2)gl	FBgn0002121	2474.94	-0.615626	0.652647	0.049884
CrebA	FBgn0004396	3955.59	-0.616509	0.652247	0.0030236
CG3009	FBgn0029720	1626.21	-0.616899	0.652071	4.03856e-05
N	FBgn0004647	2553.59	-0.619587	0.650857	0.000494908
myo	FBgn0026199	2467.45	-0.62049	0.65045	0.000120981
Nckx30C	FBgn0028704	75569.7	-0.621052	0.650196	7.19535e-07
CG17097	FBgn0265264	6210.03	-0.621633	0.649935	0.0116551
CG9328	FBgn0032886	4184.56	-0.622545	0.649524	0.020822
AOX1	FBgn0267408	3439.36	-0.623217	0.649222	0.0282005
Dh31-R	FBgn0052843	1835.34	-0.623698	0.649005	1.36408e-05
CG14459	FBgn0037171	5051.3	-0.627249	0.64741	0.000750778
ogre	FBgn0004646	2132.69	-0.627481	0.647306	0.000949369
mfas	FBgn0260745	3674.87	-0.628534	0.646833	0.0238559
qvr	FBgn0260499	31428.6	-0.6286	0.646804	0.000890116
CG14190	FBgn0030979	246.961	-0.62908	0.646589	1.21812e-06
Pgm	FBgn0003076	3230.14	-0.629649	0.646334	0.0289037
Atf6	FBgn0033010	3976.16	-0.630755	0.645838	0.0203908
Mitf	FBgn0263112	2443	-0.630759	0.645837	3.8848e-05
zfh1	FBgn0004606	2971.16	-0.631713	0.64541	0.00418314
Tis11	FBgn0011837	6574.64	-0.631905	0.645324	0.000245823
klu	FBgn0013469	2030.51	-0.633097	0.644791	0.0346936
sm	FBgn0003435	65247.9	-0.634373	0.644221	1.93651e-10
Ac76E	FBgn0004852	3138.07	-0.634587	0.644125	0.00893689
tup	FBgn0003896	2307.09	-0.642454	0.640622	0.00334318
CG11030	FBgn0031736	5144.02	-0.643967	0.639951	1.11123e-07
cta	FBgn0000384	3136.58	-0.644344	0.639784	0.0178144
Pdp1	FBgn0016694	48429.1	-0.649167	0.637648	0.00108542
beat-VI	FBgn0039584	8788.65	-0.649357	0.637564	4.75051e-05
alpha-Man-IIb	FBgn0026616	4430.68	-0.649427	0.637533	0.00616776
CG17839	FBgn0036454	26764.6	-0.649676	0.637423	7.15823e-10
Sxl	FBgn0264270	25427	-0.650971	0.636852	4.40962e-06
tkv	FBgn0003716	7909.23	-0.653275	0.635835	1.42182e-05
trol	FBgn0261451	19120	-0.653934	0.635545	1.19645e-05
grh	FBgn0259211	4587.18	-0.655769	0.634737	0.000358365
rn	FBgn0267337	2559.31	-0.65965	0.633032	1.00388e-08
CG17646	FBgn0264494	3817.99	-0.660659	0.632589	0.0148931
GEFmeso	FBgn0050115	3446.2	-0.661153	0.632373	0.00410693
MtnA	FBgn0002868	2030.21	-0.661383	0.632272	0.0437272
Ggamma30A	FBgn0267252	102631	-0.66145	0.632243	8.12109e-13
CG16758	FBgn0035348	9029.33	-0.661675	0.632144	0.00120837
cindr	FBgn0027598	7013.35	-0.662292	0.631874	5.671e-10
CG44838	FBgn0266101	11258.3	-0.662297	0.631871	1.1794e-07
dpr17	FBgn0051361	2099.6	-0.664253	0.631015	1.46751e-06
psq	FBgn0263102	22758.1	-0.665635	0.630411	4.96691e-12
flw	FBgn0000711	13502.9	-0.66583	0.630326	8.2859e-07
RapGAP1	FBgn0264895	10807.4	-0.666285	0.630127	5.88535e-12
Egfr	FBgn0003731	8964.99	-0.669544	0.628706	0.00112223
CG32982	FBgn0052982	5906.86	-0.670348	0.628355	3.8207e-09
vkg	FBgn0016075	2068.09	-0.671001	0.628071	0.0386865
Prat2	FBgn0041194	1986.86	-0.672062	0.627609	0.0176124
Rh6	FBgn0019940	2440.25	-0.672897	0.627246	0.0289456
fra	FBgn0011592	3171.43	-0.673313	0.627065	1.2166e-06
AMPdeam	FBgn0052626	5024.75	-0.677315	0.625328	0.000221277
kirre	FBgn0028369	6438.59	-0.680238	0.624062	0.000549109
fus	FBgn0023441	7704.31	-0.680454	0.623969	0.000145359
5-HT2B	FBgn0261929	3171.3	-0.680831	0.623806	0.000462548
Nplp3	FBgn0042201	2346.75	-0.68375	0.622545	0.0278804
laza	FBgn0037163	2027.04	-0.684239	0.622334	0.0354829
DIP-epsilon	FBgn0259714	1530.19	-0.684725	0.622124	0.00253297
Prosap	FBgn0040752	25866.6	-0.68537	0.621846	3.82186e-10
Hs6st	FBgn0038755	7353.19	-0.689191	0.620201	4.75642e-07
CG31689	FBgn0031449	9189.44	-0.690132	0.619797	0.00215184
CG32444	FBgn0043783	1967.48	-0.691011	0.61942	0.0350507
CG42524	FBgn0260429	9023.29	-0.691593	0.61917	0.00206237
Dh44	FBgn0012344	1540.27	-0.691757	0.619099	0.00210668
PsGEF	FBgn0264598	13781	-0.692213	0.618904	5.39021e-06
beat-Ic	FBgn0028644	4613.43	-0.695378	0.617548	0.00616776
Epac	FBgn0085421	10802.6	-0.699978	0.615582	1.059e-14
Ten-m	FBgn0004449	26855.9	-0.70055	0.615338	4.2212e-09
RhoGEF64C	FBgn0035574	5678.65	-0.700696	0.615275	0.00407149
CG8665	FBgn0032945	1480.11	-0.700901	0.615188	0.0419278
CG9691	FBgn0030160	2106.01	-0.702874	0.614347	0.0279438
Shroom	FBgn0085408	6185.19	-0.703589	0.614043	0.00330229
mbl	FBgn0265487	66469.6	-0.705624	0.613177	5.2366e-08
Gnmt	FBgn0038074	3246.96	-0.70565	0.613166	0.0115185
ush	FBgn0003963	2651.31	-0.706017	0.61301	0.00158554
Sesn	FBgn0034897	4390.52	-0.707748	0.612275	0.00607676
CG8861	FBgn0037676	3362.08	-0.709102	0.611701	4.86854e-09
nkd	FBgn0002945	6179.78	-0.710771	0.610994	0.00296804
bif	FBgn0014133	9806.01	-0.71219	0.610393	0.0012932
hppy	FBgn0263395	15254.8	-0.71253	0.610249	9.28721e-08
Ork1	FBgn0017561	2177.96	-0.712898	0.610094	0.0235926
lncRNA:Hsromega	FBgn0001234	410563	-0.714724	0.609322	6.91345e-08
dsx	FBgn0000504	8772.72	-0.718352	0.607791	0.000490806
Acn	FBgn0263198	10251.3	-0.719779	0.60719	0.0010642
cv-d	FBgn0265048	1848.11	-0.720265	0.606986	0.00374081
CG30440	FBgn0050440	1229.03	-0.722372	0.6061	2.81043e-05
lncRNA:flam	FBgn0267704	446.765	-0.726984	0.604166	0.00467383
Sodh-1	FBgn0024289	2908.48	-0.727559	0.603925	0.0109977
CadN	FBgn0015609	31057.1	-0.728679	0.603456	5.88818e-15
CG7220	FBgn0033544	3468.02	-0.728899	0.603364	1.03246e-06
Eaat1	FBgn0026439	5776.61	-0.729748	0.603009	0.00249511
CG15236	FBgn0033108	4508.83	-0.730056	0.602881	1.34458e-10
sano	FBgn0034408	6617.69	-0.731087	0.60245	0.00106976
TrissinR	FBgn0085410	1243.42	-0.731336	0.602346	0.0366406
disco-r	FBgn0042650	3035.87	-0.73134	0.602344	3.2698e-05
GstE12	FBgn0027590	1695.22	-0.731459	0.602295	0.0278379
IP3K2	FBgn0266375	3501	-0.735471	0.600622	0.00215254
lncRNA:CR43334	FBgn0263039	4438.48	-0.735473	0.600621	0.000812651
Lsp2	FBgn0002565	3281.19	-0.735694	0.600529	0.00759561
ko	FBgn0020294	2356.8	-0.7358	0.600485	0.0154986
CG31663	FBgn0051663	1306.86	-0.736277	0.600287	1.36408e-05
side	FBgn0016061	10157.8	-0.737532	0.599764	2.0134e-06
GstS1	FBgn0010226	1401.92	-0.738238	0.599471	0.0416404
CG31176	FBgn0051176	1735.39	-0.738619	0.599313	0.0283523
dve	FBgn0020307	2383.19	-0.738998	0.599155	1.48544e-07
SKIP	FBgn0051163	17624.9	-0.740328	0.598603	1.96847e-05
Lap1	FBgn0033984	2169.51	-0.740955	0.598343	0.0105176
spri	FBgn0085443	8831.02	-0.742875	0.597547	2.14628e-06
Pdh	FBgn0011693	1983.42	-0.742997	0.597497	0.00756381
Pde11	FBgn0085370	9660.55	-0.744286	0.596963	8.92613e-07
Lsd-1	FBgn0039114	2402.08	-0.747716	0.595546	0.0130227
Su(var)3-3	FBgn0260397	12742.8	-0.747825	0.595501	7.89192e-05
CG2493	FBgn0032864	889.183	-0.754226	0.592864	0.0260598
Cyp6w1	FBgn0033065	2168.8	-0.757686	0.591444	0.0144613
T48	FBgn0004359	1615.3	-0.75861	0.591066	0.0271007
Fkbp14	FBgn0010470	1046.47	-0.758742	0.591012	0.000957086
Obp44a	FBgn0033268	2536.37	-0.759032	0.590893	0.0101003
dsb	FBgn0035290	5354.75	-0.759065	0.590879	6.25381e-05
CG5151	FBgn0036576	10035.7	-0.76087	0.59014	1.27943e-07
Synd	FBgn0053094	3935.43	-0.761	0.590087	2.02835e-06
Cyp4e2	FBgn0014469	1336.91	-0.761493	0.589886	0.0373811
plum	FBgn0039431	6805.87	-0.763225	0.589178	2.00297e-07
fon	FBgn0032773	1349.98	-0.764544	0.588639	0.0358343
sona	FBgn0034903	1326.2	-0.766297	0.587925	0.0144613
side-VIII	FBgn0086604	11251.4	-0.766442	0.587866	1.61082e-07
ths	FBgn0033652	10868.8	-0.770323	0.586286	1.10895e-07
CG10345	FBgn0027562	2105.42	-0.772567	0.585375	0.00021629
Tsp97E	FBgn0039465	5391.04	-0.773972	0.584805	2.30125e-13
ASPP	FBgn0034606	5731.27	-0.775506	0.584184	1.55644e-09
zld	FBgn0259789	2700.1	-0.776589	0.583745	0.000258692
teq	FBgn0023479	11582.7	-0.777211	0.583494	0.000258692
CG34227	FBgn0085256	1503.36	-0.779707	0.582485	0.0257259
Apoltp	FBgn0032136	13065	-0.783314	0.581031	0.000183609
CG6145	FBgn0033853	1896.41	-0.785785	0.580036	0.0143774
dpr13	FBgn0034286	5305.98	-0.787052	0.579527	0.00113853
rols	FBgn0041096	1469.79	-0.788765	0.578839	0.0247591
Ace	FBgn0000024	23463.1	-0.788857	0.578802	5.00632e-11
Rbp6	FBgn0260943	108047	-0.790528	0.578132	4.85357e-06
Frq1	FBgn0030897	12210.1	-0.791429	0.577771	1.52507e-07
CG42663	FBgn0261545	2585.15	-0.791767	0.577636	6.06434e-09
Pdk	FBgn0017558	8792.9	-0.792726	0.577252	2.62653e-14
Ddr	FBgn0053531	3850.8	-0.793709	0.576859	1.82363e-05
CG7536	FBgn0030890	1216.24	-0.795898	0.575985	0.03349
ttk	FBgn0003870	3966.27	-0.800012	0.574344	0.000200559
Cbp53E	FBgn0004580	7029.65	-0.800767	0.574044	1.14863e-06
lncRNA:CR44909	FBgn0266214	6202.41	-0.802392	0.573398	1.20902e-07
Galk	FBgn0263199	2463.19	-0.803826	0.572828	0.0061852
Tep2	FBgn0041182	4359.26	-0.80469	0.572485	0.00137534
beat-Vc	FBgn0038084	1998.59	-0.807125	0.57152	0.0100958
CG6123	FBgn0030913	4745.73	-0.811301	0.569868	0.000582262
CG44422	FBgn0265595	11922.5	-0.81182	0.569663	1.15947e-05
Gart	FBgn0000053	4061.82	-0.812474	0.569405	0.00146392
cdi	FBgn0004876	8256.06	-0.814054	0.568781	4.32073e-07
CG31690	FBgn0051690	5095.68	-0.817556	0.567402	0.000617252
Dro	FBgn0010388	2366.99	-0.820533	0.566233	0.00556274
CG41378	FBgn0085638	21645	-0.82279	0.565348	2.32662e-11
Tps1	FBgn0027560	4863.82	-0.824717	0.564593	0.000735482
pug	FBgn0020385	3482.7	-0.826013	0.564086	0.00179141
dpr15	FBgn0037993	2147.66	-0.826097	0.564053	6.29796e-07
FER	FBgn0000723	4858.72	-0.826944	0.563722	3.06296e-06
DIP-beta	FBgn0259245	3136.12	-0.828343	0.563176	2.03307e-06
CG1358	FBgn0033196	5241.52	-0.828397	0.563155	4.22963e-11
CG33144	FBgn0053144	15406.9	-0.829508	0.562721	1.06394e-10
sli	FBgn0264089	10658.5	-0.829818	0.5626	1.77224e-11
Jabba	FBgn0259682	1554.53	-0.830387	0.562379	0.0143378
Fas3	FBgn0000636	7712.34	-0.835487	0.560394	1.09616e-07
IM4	FBgn0040653	1738.01	-0.836268	0.560091	0.0103206
betaTub97EF	FBgn0003890	1616.08	-0.836789	0.559888	0.012285
frtz	FBgn0086698	516.84	-0.838865	0.559083	0.0440467
boss	FBgn0000206	963.633	-0.840557	0.558428	0.00112625
Lasp	FBgn0063485	855.107	-0.842719	0.557592	0.0449778
dpr11	FBgn0053202	10607	-0.846063	0.556301	2.07983e-07
CG31869	FBgn0051869	1460.75	-0.848046	0.555537	0.0140137
side-V	FBgn0085400	6405.28	-0.85052	0.554585	7.75785e-09
CG7149	FBgn0031948	1118.01	-0.851868	0.554067	0.02517
lncRNA:CR46006	FBgn0267668	14945.7	-0.852196	0.553941	2.96108e-11
glob1	FBgn0027657	2405.86	-0.857212	0.552018	0.00326032
CG32521	FBgn0052521	23645.4	-0.858259	0.551618	3.24654e-19
side-IV	FBgn0038156	1395.56	-0.859854	0.551008	0.0139234
CG12541	FBgn0029930	2434.66	-0.863415	0.54965	1.53923e-10
CrzR	FBgn0036278	795.867	-0.863803	0.549502	0.0280449
tim	FBgn0014396	9924.17	-0.866176	0.548599	4.69278e-05
nAChRalpha3	FBgn0015519	10822.2	-0.867784	0.547988	1.10573e-07
beta-Man	FBgn0037215	1055.08	-0.874912	0.545287	0.0233313
ZnT41F	FBgn0025693	1154.43	-0.875341	0.545125	0.0188758
CG6067	FBgn0029828	838.144	-0.875547	0.545047	0.00391601
salm	FBgn0261648	833.42	-0.877698	0.544235	0.0365716
CG2016	FBgn0250839	1093.07	-0.877843	0.54418	0.0209003
l(1)G0196	FBgn0027279	18365.7	-0.879241	0.543653	1.20507e-16
zyd	FBgn0265767	994.731	-0.883911	0.541896	0.0132421
Cyt-b5-r	FBgn0000406	5732.77	-0.884778	0.541571	0.000143447
CG8034	FBgn0031011	2671.76	-0.885274	0.541385	7.16531e-10
CG13937	FBgn0035287	2755.75	-0.890267	0.539514	0.00136476
CG4629	FBgn0031299	3225.44	-0.892042	0.538851	2.07983e-07
Dh31	FBgn0032048	989.648	-0.897411	0.536849	0.0221224
Cyp4d21	FBgn0031925	1597.96	-0.897711	0.536738	0.00017221
Achl	FBgn0033936	958.176	-0.898239	0.536541	0.0237144
Fili	FBgn0085397	3432.04	-0.898811	0.536329	0.000580313
nAChRalpha7	FBgn0086778	42163.2	-0.899058	0.536237	1.72248e-09
kek5	FBgn0031016	12604.1	-0.901358	0.535382	1.11287e-05
ninaB	FBgn0002937	1150.92	-0.901822	0.53521	0.00283173
lncRNA:CR43650	FBgn0263659	2901.52	-0.902643	0.534906	2.6642e-05
Ca-alpha1T	FBgn0264386	54717.7	-0.903595	0.534553	9.07638e-11
SmydA-8	FBgn0053548	760.223	-0.904421	0.534247	0.0358535
tobi	FBgn0261575	3739.62	-0.908698	0.532666	0.000364942
CG12594	FBgn0037941	1112.98	-0.911214	0.531737	0.0147116
Doa	FBgn0265998	31254.9	-0.914052	0.530693	1.77741e-14
CG5888	FBgn0028523	1574.01	-0.915346	0.530217	0.00556274
hig	FBgn0010114	11747.9	-0.916324	0.529857	6.61162e-14
Ipk1	FBgn0050295	942.262	-0.916629	0.529745	3.51022e-05
dpr1	FBgn0040726	9217.55	-0.918738	0.528972	4.69741e-07
sNPF-R	FBgn0036934	2814.7	-0.918925	0.528903	1.57898e-06
CG44153	FBgn0265002	4859.02	-0.919193	0.528805	3.16603e-06
ClC-a	FBgn0051116	3107.67	-0.920753	0.528233	3.2932e-06
kek2	FBgn0015400	6352.02	-0.923435	0.527252	3.11165e-17
LanA	FBgn0002526	792.809	-0.927813	0.525655	0.0281527
Vinc	FBgn0004397	2567.03	-0.927839	0.525645	0.000996616
Octbeta2R	FBgn0038063	19383.4	-0.92846	0.525419	1.43286e-07
Vsx2	FBgn0263512	1401.34	-0.930539	0.524662	9.02451e-06
CG42458	FBgn0259935	1640.64	-0.931132	0.524447	6.93637e-06
CG31183	FBgn0051183	2010.43	-0.931198	0.524423	4.32697e-06
sns	FBgn0024189	8510.92	-0.932557	0.523929	8.92275e-07
santa-maria	FBgn0025697	1176.47	-0.933291	0.523662	0.010466
CG13594	FBgn0035041	2835.4	-0.936602	0.522462	0.0006015
stan	FBgn0024836	5000.7	-0.94348	0.519977	1.93651e-10
E23	FBgn0020445	880.09	-0.943543	0.519954	0.0196265
hfw	FBgn0001189	703.324	-0.943961	0.519804	0.0314583
Eip74EF	FBgn0000567	9841.56	-0.946428	0.518916	1.03776e-17
CG6983	FBgn0035896	1669.02	-0.947438	0.518552	0.00316665
RhoGAP18B	FBgn0261461	3721.41	-0.952582	0.516707	1.53752e-09
dpr3	FBgn0053516	4312.82	-0.954966	0.515854	1.02887e-07
AttC	FBgn0041579	526.04	-0.955257	0.51575	0.0492445
grn	FBgn0001138	1777.04	-0.955905	0.515518	0.00232677
CG17108	FBgn0032285	15649.4	-0.956279	0.515384	1.54361e-06
Trim9	FBgn0051721	5415.01	-0.956441	0.515327	2.51474e-06
IM3	FBgn0040736	3644.75	-0.956833	0.515186	0.000165379
CG7470	FBgn0037146	13600.8	-0.957363	0.514997	2.08231e-06
dpr2	FBgn0261871	3042.88	-0.957599	0.514913	0.000325271
GABA-B-R3	FBgn0031275	2069.13	-0.959575	0.514208	4.32838e-05
Teh1	FBgn0037766	5029.75	-0.9623	0.513238	4.38173e-10
CG11241	FBgn0037186	563.075	-0.963758	0.51272	0.0412323
CG31323	FBgn0051323	1049.08	-0.96385	0.512687	0.0105663
CG2736	FBgn0035090	1873.21	-0.967375	0.511436	0.00166696
CG15293	FBgn0028526	2228.14	-0.967928	0.51124	0.000905227
gol	FBgn0004919	8915.21	-0.971774	0.509879	3.39969e-06
peb	FBgn0003053	952.028	-0.973752	0.50918	0.0124417
LpR1	FBgn0066101	4530.41	-0.977239	0.507951	4.69278e-05
dnr1	FBgn0260866	7339.43	-0.979132	0.507285	6.62108e-16
beat-IIIc	FBgn0032629	7734.11	-0.97943	0.50718	6.07079e-06
Meltrin	FBgn0265140	5301.63	-0.980425	0.50683	2.38201e-05
SoxN	FBgn0029123	3265.02	-0.980487	0.506808	0.000164728
beat-Va	FBgn0038087	1112.49	-0.98186	0.506326	2.33079e-10
CG4341	FBgn0028481	12128.9	-0.982514	0.506097	3.47639e-16
Dll	FBgn0000157	1555.06	-0.98426	0.505485	8.16529e-09
lncRNA:CR45347	FBgn0266886	3641.59	-0.985123	0.505183	1.96428e-12
CG11594	FBgn0035484	1301.19	-0.985497	0.505052	0.00448046
CG15118	FBgn0034418	2132.59	-0.989011	0.503823	6.50763e-10
CG2246	FBgn0039790	2409.28	-0.989841	0.503533	1.42992e-05
rgr	FBgn0267792	769.772	-0.990319	0.503366	0.0182764
Cyp309a1	FBgn0031432	669.761	-0.991131	0.503083	0.0249753
CG15096	FBgn0034394	1567.15	-0.992148	0.502729	0.00226473
CG13579	FBgn0035010	2959.11	-0.99536	0.501611	8.04282e-10
Mmp2	FBgn0033438	16815.1	-0.996102	0.501353	2.64079e-11
Nplp2	FBgn0040813	12280.8	-0.996445	0.501234	9.30978e-07
CG34393	FBgn0085422	2836.96	-0.997163	0.500984	1.35233e-06
Amy-p	FBgn0000079	1489.48	-0.998189	0.500628	0.00251742
sv	FBgn0005561	3126.82	-1.0026	0.499098	0.00013263
lqf	FBgn0028582	11041.4	-1.00339	0.498827	8.57947e-17
CG2839	FBgn0031273	589.621	-1.00633	0.497811	0.0289443
CG13077	FBgn0032810	500.169	-1.00713	0.497536	0.0384521
Ance-5	FBgn0035076	937.885	-1.00892	0.496917	0.00939055
Cyp28d1	FBgn0031689	2520.68	-1.00955	0.4967	0.000287393
CG1979	FBgn0026563	796.7	-1.01138	0.496071	0.0141103
TotA	FBgn0028396	538.332	-1.01303	0.495504	0.0324988
ninaE	FBgn0002940	142972	-1.01363	0.495298	1.9302e-08
CG2145	FBgn0030251	2122.83	-1.01546	0.49467	0.00052849
CG34376	FBgn0085405	3574.11	-1.01867	0.493572	3.06222e-13
Fs	FBgn0259878	916.634	-1.01885	0.493511	0.00910331
nolo	FBgn0051619	9336.43	-1.02525	0.491325	2.11631e-17
NimB2	FBgn0028543	1107.73	-1.02535	0.491292	0.00485887
CG34347	FBgn0085376	4998.64	-1.02712	0.490688	3.72285e-16
Rh5	FBgn0014019	1245.67	-1.02738	0.4906	0.00324632
CG17193	FBgn0040571	964.808	-1.02804	0.490374	0.0072023
UK114	FBgn0086691	499.634	-1.0388	0.486733	0.0315641
Wnt4	FBgn0010453	837.909	-1.04189	0.48569	0.0072817
fng	FBgn0011591	1336.04	-1.04249	0.485489	0.00215527
Cpr72Ec	FBgn0036619	1854.27	-1.0427	0.485418	0.000613545
CG34351	FBgn0085380	2328.08	-1.04326	0.48523	6.88483e-08
Rh4	FBgn0003250	3062.81	-1.04389	0.485019	6.63172e-05
CG2082	FBgn0027608	7563.12	-1.04665	0.48409	2.48904e-07
Scp2	FBgn0020907	1225.67	-1.04869	0.483406	0.00272674
Ekar	FBgn0039916	1633.41	-1.05104	0.48262	3.00808e-07
CG4666	FBgn0029838	399.661	-1.05376	0.481711	0.0417918
CG7997	FBgn0034117	615.276	-1.05472	0.48139	0.018505
dpr18	FBgn0030723	1060.05	-1.05518	0.481238	0.00408739
CG1468	FBgn0030157	1469.15	-1.05568	0.481071	0.0012932
Gat	FBgn0039915	1093.66	-1.05744	0.480483	0.00359515
lncRNA:CR44833	FBgn0266096	217.527	-1.06047	0.479477	0.0198258
Clk	FBgn0023076	3625.53	-1.06197	0.478979	2.09611e-05
bab1	FBgn0004870	4813.81	-1.06344	0.478489	5.35803e-06
CG32365	FBgn0052365	948.791	-1.06623	0.477567	0.000168598
Ugt86Dd	FBgn0040256	410.949	-1.06687	0.477352	0.0370029
lncRNA:CR45332	FBgn0266871	503.545	-1.06798	0.476986	0.0259228
Gel	FBgn0010225	8231.46	-1.06847	0.476826	4.75642e-07
CG6503	FBgn0040606	7613.69	-1.06934	0.476536	6.35471e-07
CG2233	FBgn0029990	4355.22	-1.06957	0.476462	7.43697e-06
smal	FBgn0085409	5852.83	-1.07013	0.476275	4.46142e-43
CG42598	FBgn0260997	344.458	-1.07118	0.475931	0.0473142
lncRNA:CR32773	FBgn0052773	466.082	-1.07246	0.475507	0.0290499
CadN2	FBgn0262018	11888.5	-1.07668	0.47412	9.88252e-15
CG10560	FBgn0039325	648.753	-1.08073	0.472791	0.0113965
apolpp	FBgn0087002	216671	-1.0813	0.472604	1.33247e-09
Caf1-180	FBgn0030054	247.684	-1.08198	0.472381	0.0476949
Dscam3	FBgn0261046	5867.69	-1.08199	0.472376	3.56222e-12
hbs	FBgn0029082	1627.92	-1.085	0.471394	0.000578902
kl-3	FBgn0267432	1005.16	-1.09597	0.467822	0.0032033
Ets65A	FBgn0005658	1139.16	-1.09689	0.467523	0.0020431
Ance-4	FBgn0033366	456.512	-1.09803	0.467154	0.0256711
Hk	FBgn0263220	23324.9	-1.103	0.465549	1.39576e-26
CG40470	FBgn0058470	3968.61	-1.10306	0.465529	1.53752e-09
CG14274	FBgn0032023	746.467	-1.10502	0.464895	0.00649731
Npc2h	FBgn0039801	1188.02	-1.1074	0.46413	0.00153747
CG13229	FBgn0033579	348.322	-1.10992	0.463321	0.0371968
atk	FBgn0036995	535.568	-1.11237	0.462534	0.0164444
ct	FBgn0004198	16836.4	-1.11353	0.462162	1.77224e-11
Cyp4s3	FBgn0030615	178.895	-1.11445	0.461866	0.0492177
CG3655	FBgn0040397	3705.75	-1.11882	0.460471	5.08409e-07
CG8468	FBgn0033913	3640.08	-1.11911	0.460379	6.05626e-06
axo	FBgn0262870	3776.54	-1.12377	0.458892	5.06702e-10
beat-IIa	FBgn0038498	6002.74	-1.12527	0.458416	3.38453e-10
CG17716	FBgn0000633	12773	-1.13167	0.456387	3.64485e-26
DIP-eta	FBgn0031725	880.691	-1.13555	0.455161	0.00330131
pdm3	FBgn0261588	15452.3	-1.14084	0.453495	9.44947e-15
fred	FBgn0051774	10571.2	-1.14784	0.4513	9.77042e-16
Obp99c	FBgn0039682	5703.55	-1.14875	0.451017	2.82531e-07
LpR2	FBgn0051092	8144.7	-1.14889	0.450973	1.5406e-14
CG18675	FBgn0040696	352.348	-1.14916	0.450888	0.0182939
CG5966	FBgn0029831	1646.86	-1.15101	0.45031	0.000207995
CG43340	FBgn0263077	16710.5	-1.1515	0.450158	2.44869e-15
CG40006	FBgn0058006	8263.62	-1.16002	0.447507	9.74921e-10
lncRNA:CR45533	FBgn0267089	440.342	-1.16054	0.447345	0.0179305
CG9109	FBgn0031765	263.61	-1.16124	0.447129	0.0407864
Idgf5	FBgn0064237	244.908	-1.16233	0.446792	0.0443464
CG31145	FBgn0051145	13212.3	-1.1659	0.445687	2.29626e-12
ap	FBgn0000099	4337.02	-1.16724	0.445273	1.10571e-08
Gbeta76C	FBgn0004623	3374.36	-1.16886	0.444773	7.16531e-10
rdo	FBgn0243486	4878.53	-1.1719	0.443835	6.62504e-10
Sox21b	FBgn0042630	1097.89	-1.17214	0.443762	0.000996256
lncRNA:CR44779	FBgn0266005	682.772	-1.17268	0.443595	0.00530527
app	FBgn0260941	16133.5	-1.17404	0.44318	3.82238e-12
trp	FBgn0003861	19214.5	-1.17971	0.44144	6.23586e-10
sdk	FBgn0021764	5881.61	-1.18324	0.440362	9.34165e-08
Drep3	FBgn0028407	283.183	-1.18459	0.43995	0.0328199
Tab2	FBgn0086358	2112.23	-1.18723	0.439144	3.11627e-05
beat-Ib	FBgn0028645	4226.06	-1.19044	0.43817	9.40746e-12
CG45781	FBgn0267428	6988.49	-1.19061	0.438119	7.09133e-20
lz	FBgn0002576	590.028	-1.19232	0.437599	0.00683005
CG5778	FBgn0038930	2963.06	-1.19549	0.436639	3.65793e-06
CG43795	FBgn0264339	3798.75	-1.19607	0.436462	8.57238e-07
Rh3	FBgn0003249	4538.36	-1.19687	0.436222	2.84517e-07
rdhB	FBgn0038946	454.236	-1.19976	0.435348	0.0126501
DIP-theta	FBgn0051646	1548.25	-1.2	0.435277	0.000136194
Mob2	FBgn0259481	28955.9	-1.20211	0.434638	1.20413e-18
GNBP-like3	FBgn0034511	537.167	-1.2052	0.433709	0.00794508
CG11400	FBgn0034198	441.913	-1.20654	0.433306	0.0128186
Gbp2	FBgn0034200	1333.96	-1.21171	0.431758	0.000157677
CG16965	FBgn0032387	206.901	-1.21623	0.430406	0.0318121
srp	FBgn0003507	2928.78	-1.22176	0.428759	2.25668e-06
retn	FBgn0004795	2804.11	-1.22508	0.427774	2.85688e-08
Amy-d	FBgn0000078	1301.33	-1.22578	0.427565	0.00022235
MsR1	FBgn0035331	899.166	-1.22583	0.427551	0.00119388
ssp6	FBgn0035676	1187.07	-1.22941	0.426493	0.000333199
Pdfr	FBgn0260753	4687.57	-1.22945	0.42648	1.78689e-14
CR17025	FBgn0040554	673.862	-1.22982	0.42637	0.0032478
pnt	FBgn0003118	2905.7	-1.23026	0.426241	1.46898e-08
Pvf3	FBgn0085407	9151.44	-1.23316	0.425386	4.01371e-23
erm	FBgn0031375	985.963	-1.2394	0.423549	0.000694593
Sox102F	FBgn0039938	5255.63	-1.24179	0.422848	3.44571e-08
CG10348	FBgn0032707	516.152	-1.24407	0.42218	0.00648342
Rh7	FBgn0036260	2124.06	-1.24496	0.421919	1.03333e-05
t	FBgn0086367	1641.8	-1.24572	0.421696	4.71534e-05
e	FBgn0000527	733.962	-1.24893	0.420761	0.00203059
lncRNA:CR45457	FBgn0267013	195.879	-1.24937	0.420633	0.0356184
CG4716	FBgn0033820	6008.33	-1.25163	0.419973	1.16735e-08
CG3376	FBgn0034997	1079.35	-1.25467	0.419091	0.000376388
ninaG	FBgn0037896	185.78	-1.25477	0.419062	0.0362625
oc	FBgn0004102	3933.31	-1.25791	0.418148	1.43479e-07
Zasp67	FBgn0036044	2239.45	-1.26274	0.416751	5.28941e-06
norpA	FBgn0262738	52898.4	-1.26738	0.415412	9.84193e-15
CG16926	FBgn0040732	1366.58	-1.26913	0.414909	9.138e-05
Nos	FBgn0011676	2753.89	-1.27144	0.414246	6.01779e-09
CG42594	FBgn0260971	8155.65	-1.28085	0.411554	9.24376e-12
CarT	FBgn0032879	427.918	-1.28113	0.411473	0.00793609
CG14082	FBgn0036851	1798.72	-1.28483	0.41042	3.15568e-11
CG33143	FBgn0053143	3558.18	-1.28524	0.410304	9.17309e-20
CG34166	FBgn0085195	4549.86	-1.28952	0.409086	2.32415e-08
Glt	FBgn0001114	11316.2	-1.29371	0.407899	7.83688e-11
Hmx	FBgn0264005	294.951	-1.29416	0.407774	0.00927236
Pph13	FBgn0023489	285.865	-1.30026	0.406054	0.00855329
TkR99D	FBgn0004622	629.146	-1.30085	0.405888	0.00212939
Myo28B1	FBgn0040299	403.95	-1.30336	0.405181	0.00772764
CG2121	FBgn0033289	618.043	-1.31046	0.403192	1.67619e-11
lncRNA:CR32111	FBgn0052111	606.953	-1.31276	0.402551	0.00215254
CG2556	FBgn0030396	428.602	-1.31711	0.401337	0.00602554
Muc14A	FBgn0052580	976.707	-1.3229	0.399731	0.000255877
Lst	FBgn0034140	891.933	-1.3247	0.399232	0.000387636
Spn88Eb	FBgn0038299	405.13	-1.32523	0.399085	0.00650579
CG45002	FBgn0266354	13570	-1.32524	0.399084	1.12601e-19
Arr1	FBgn0000120	24342.5	-1.32602	0.398866	9.3454e-13
ort	FBgn0003011	293.693	-1.3309	0.39752	0.0127169
CG30026	FBgn0050026	360.426	-1.33132	0.397404	0.0071726
Ir41a	FBgn0040849	846.734	-1.33727	0.395769	4.82404e-09
inaC	FBgn0004784	3135.85	-1.34594	0.393396	8.08518e-08
Cpr76Bc	FBgn0036880	502.996	-1.35489	0.390966	0.00276601
sPLA2	FBgn0033170	261.198	-1.35725	0.390325	0.00584161
ham	FBgn0045852	615.381	-1.35794	0.390138	0.00132597
scro	FBgn0028993	6614.6	-1.37045	0.386771	1.35509e-15
Culd	FBgn0035880	3391.5	-1.37453	0.385679	2.08946e-08
Lgr4	FBgn0085440	411.096	-1.38441	0.383046	0.00391601
msi	FBgn0011666	13719.2	-1.38949	0.381699	7.52529e-19
ninaC	FBgn0002938	23677.8	-1.3895	0.381696	6.25192e-14
Hdc	FBgn0005619	1016.11	-1.39011	0.381535	8.4205e-05
MsR2	FBgn0264002	902.598	-1.39205	0.381023	0.000157677
CG33639	FBgn0053639	1984.86	-1.39384	0.380551	9.24242e-07
lncRNA:CR45312	FBgn0266851	539.641	-1.41389	0.375298	0.00126058
CG10936	FBgn0034253	472.007	-1.42001	0.37371	0.000264851
Hml	FBgn0029167	1485.94	-1.42053	0.373576	4.50553e-06
CG4168	FBgn0028888	5531.13	-1.42092	0.373474	1.55172e-22
CG31038	FBgn0051038	4434.51	-1.47375	0.360046	1.21814e-10
beat-IIb	FBgn0038494	3166.06	-1.47502	0.359727	2.56713e-09
Crys	FBgn0005664	2981.45	-1.47724	0.359176	4.2628e-09
AstA-R1	FBgn0266429	3720.37	-1.47764	0.359076	3.11976e-12
Dhc98D	FBgn0013813	844.036	-1.49009	0.355991	6.29758e-05
pnr	FBgn0003117	234.795	-1.51485	0.349933	0.00391601
inaD	FBgn0001263	5932.59	-1.51516	0.349857	2.20421e-12
gl	FBgn0004618	1036.76	-1.53408	0.3453	8.88145e-06
Lim3	FBgn0002023	1179.78	-1.53994	0.3439	5.50684e-12
CG15186	FBgn0037448	1717.76	-1.54981	0.341556	2.59533e-13
acj6	FBgn0000028	1856.35	-1.566	0.337743	4.07823e-08
sim	FBgn0004666	419.921	-1.56606	0.337729	0.000779477
ana	FBgn0011746	521.079	-1.57233	0.336264	0.000295464
rtp	FBgn0087005	3100.9	-1.58164	0.334101	2.37296e-14
Drgx	FBgn0085369	2080.86	-1.5885	0.332517	8.16529e-09
Tk	FBgn0037976	1576.34	-1.61921	0.325513	6.18098e-08
chp	FBgn0267435	12452	-1.63678	0.321573	2.25031e-17
Ppn	FBgn0003137	4393.57	-1.65438	0.317675	9.66041e-20
CG15478	FBgn0029955	415.521	-1.69255	0.309379	4.82646e-05
AstC-R1	FBgn0036790	1422.14	-1.69863	0.308079	3.21925e-08
TfAP-2	FBgn0261953	1097.09	-1.77316	0.292567	8.63742e-08
DCX-EMAP	FBgn0259099	2744.99	-1.78085	0.291012	8.21647e-15
bsh	FBgn0000529	214.299	-1.78478	0.29022	0.000228256
Sr-CI	FBgn0014033	272.202	-1.81129	0.284937	0.000316596
CG45782	FBgn0267429	51299	-1.84376	0.278596	6.63627e-26
trpl	FBgn0005614	22154.2	-1.86978	0.273614	7.40294e-54
prom	FBgn0259210	2293.62	-1.96178	0.256712	8.02551e-14
rdgA	FBgn0261549	37800.6	-1.97461	0.254438	4.27019e-29
