# Supplementary material
Source: publisher figshare collection journal article supplement (https://gsajournals.figshare.com/articles/dataset/_/7005842)
Supplement: Supplementary file 1 [file 2]

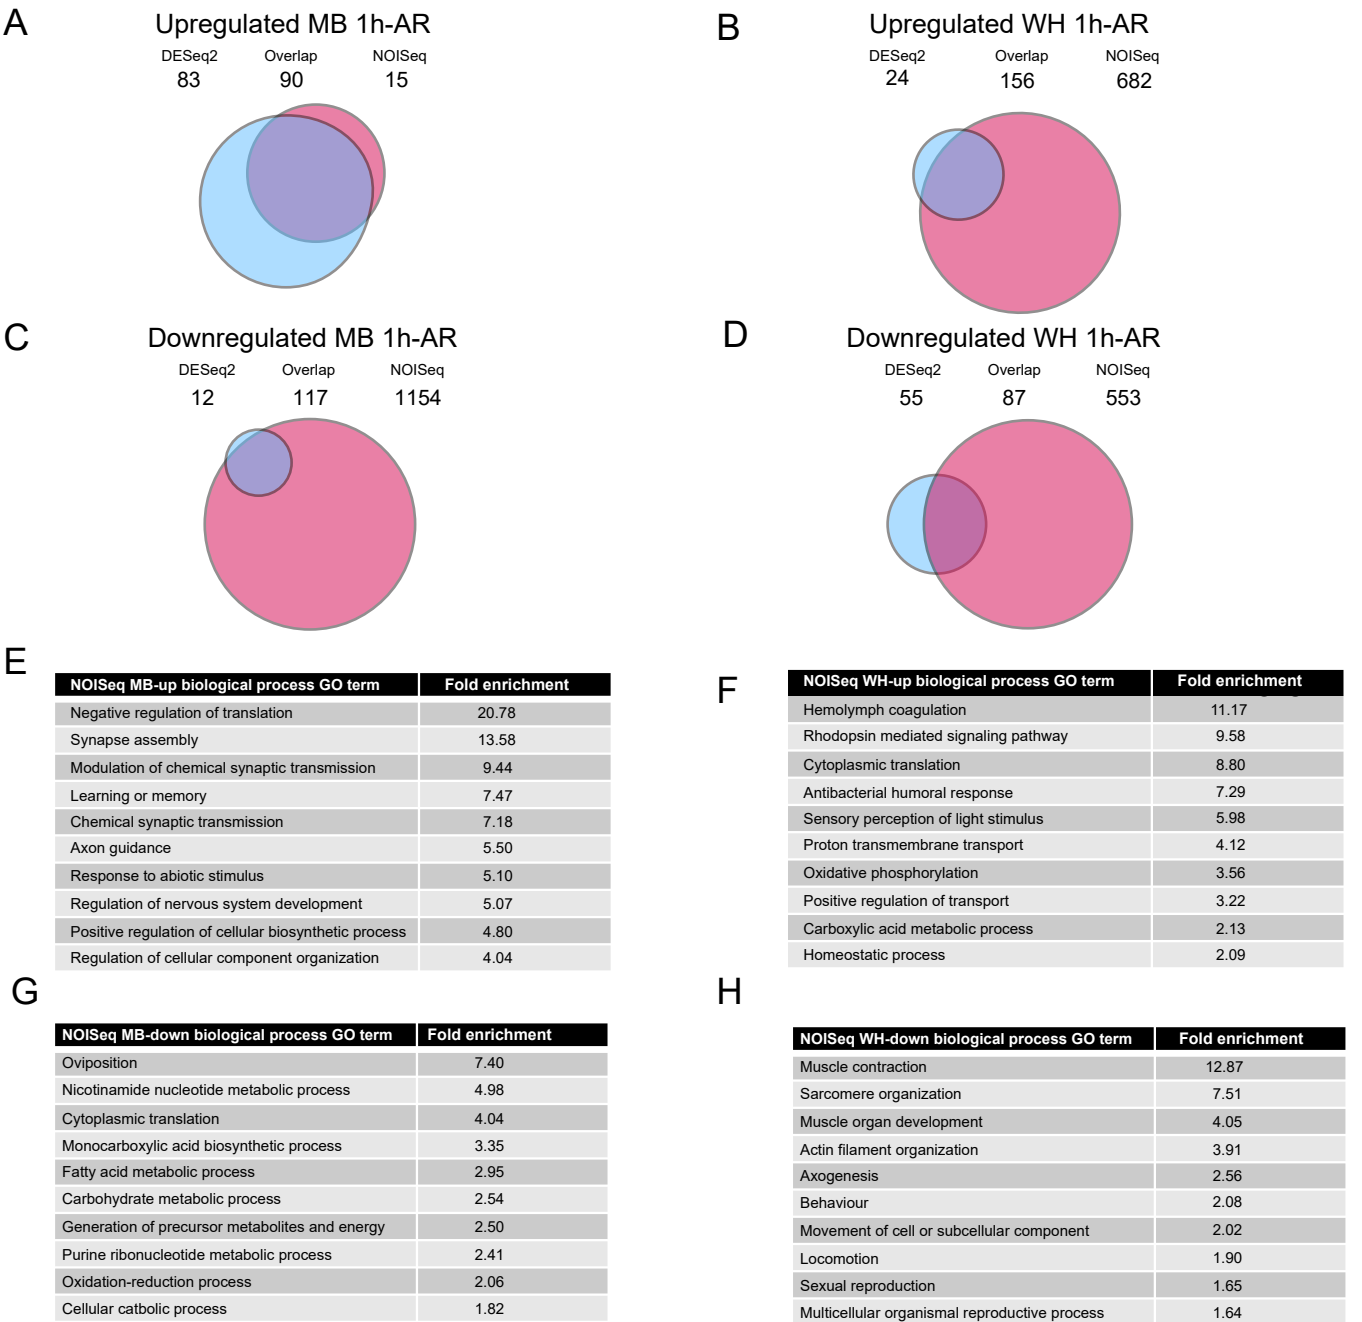

**Figure S2: Comparison of DE results between DESeq2 and NOISeq**

(A-D) Venn diagrams showing overlap of differentially expressed (DE) genes between DESeq2 and NOISeq. (A) Upregulated MB 1h-AR (MB-up), (B) Upregulated WH 1h-AR (WH-up), (C) Downregulated MB 1h-AR (MB-down), (D) Downregulated WH 1h-AR (WH-down). (E-H) GO enrichment analysis for biological processes from NOISeq DE genes using PANTHER ( $p < 0.05$ , Binomial test with Bonferroni correction, minimum 5 genes, sorted by hierarchical view). The top GO terms, heading each GO hierarchical cluster are displayed, sorted by fold enrichment, for (E) MB-up, (F) WH-up, (G) MB-down, (H) WH-down.
